# Lipid-specific protein oligomerization is regulated by two interfaces in Marburg virus matrix protein VP40

Souad Amiar<sup>1†</sup>, Monica L. Husby<sup>1†</sup>, Kaveesha J. Wijesinghe<sup>1,2†</sup>, Stephanie Angel<sup>1</sup>, Nisha Bhattarai<sup>3</sup>, Bernard S. Gerstman<sup>3,4</sup>, Prem P. Chapagain<sup>3,4</sup>, Sheng Li<sup>5</sup>, Robert V. Stahelin<sup>1\*</sup>

## Affiliations

<sup>1</sup>Department of Medicinal Chemistry & Molecular Pharmacology, Purdue University, West Lafayette IN 47906.

<sup>2</sup>Department of Chemistry and Biochemistry, University of Notre Dame, Notre Dame, IN 46556.

<sup>3</sup>Department of Physics & <sup>4</sup>Biomolecular Sciences Institute, Florida International University, Miami FL 33199.

<sup>5</sup>Department of Medicine, University of California San Diego, La Jolla CA 92093

\*Corresponding author: Robert V. Stahelin: Department of Medicinal Chemistry & Molecular Pharmacology, Purdue University, West Lafayette IN 47906; [rstaheli@purdue.edu](mailto:rstaheli@purdue.edu); Tel: 1-765-494-4152; Fax: 1-765-494-1414

†These authors contributed equally to this work

## Summary

Marburg virus major matrix protein (mVP40) dimers associate with anionic lipids at the plasma membrane and undergo a dynamic and extensive self-oligomerization into the structural matrix layer which confers the virion shape and stability. Using a myriad of *in vitro* and cellular techniques, we present a mVP40 assembly model highlighting two distinct oligomerization interfaces (N-terminal domain (NTD) and C-terminal domain (CTD)) in mVP40. Cellular studies of NTD and CTD oligomerization interface mutants demonstrated the importance of each interface in the mVP40 matrix assembly through protein trafficking to the plasma membrane and homo-multimerization that induced protein enrichment, plasma membrane fluidity changes and elongations at the plasma membrane. A novel APEX-TEM method was employed to closely assess the ultrastructural localization of and formation of viral particles for wild type and mutants. Taken together, these studies present a mechanistic model of mVP40 oligomerization and assembly at the plasma membrane during virion assembly.

## Introduction

The *Filoviridae* family of viruses, which includes Marburg virus (MARV) and its cousin Ebola virus (EBOV), have been responsible for several highly fatal outbreaks since the late 1960s (Suzuki and Gojobori, 1997; Slenczka and Klenk, 2007; Leroy, Gonzalez and Baize, 2011; Breman *et al.*, 2016; World Health Organization, 2019). Filoviruses are lipid-enveloped viruses harboring a negative sense RNA genome which bud and release new filamentous viral particles from the host cell plasma membrane (Beer, Kurth and Bukreyev, 1999; Kolesnikova *et al.*, 2002; Noda *et al.*, 2002; Kolesnikova, Bamberg, *et al.*, 2004; Bray and Geisbert, 2005; Leroy, Gonzalez and Baize, 2011; Bharat *et al.*, 2012). The viral matrix protein VP40 of MARV and EBOV (mVP40 and eVP40, respectively) is the primary viral component responsible for directing the assembly and budding of viral particles from the host cell plasma membrane inner leaflet (Feldmann, Klenk and Sanchez, 1993; Hartly *et al.*, 2000; Jasenosky *et al.*, 2001; Kolesnikova

48 *et al.*, 2002; Noda *et al.*, 2002). Indeed, VP40 is able to produce virus-like particles (VLPs) when  
49 expressed in mammalian cells even in absence of other viral proteins (Harty *et al.*, 2000; Jasenosky *et al.*,  
50 2001; Kolesnikova *et al.*, 2002; Noda *et al.*, 2002). Understanding the mechanism by which filoviruses  
51 assemble to form new virions, is tightly related to understanding the VP40 structure and function  
52 relationship with target lipids that may induce or stabilize VP40 oligomers.

53 VP40 forms a dimer (Bornholdt *et al.*, 2013; Oda *et al.*, 2016) with an amino-terminal domain  
54 (NTD) involved in dimerization and oligomerization and a carboxy-terminal domain (CTD) responsible  
55 for membrane binding (Bornholdt *et al.*, 2013; Oda *et al.*, 2016; Wijesinghe and Stahelin, 2016; Del  
56 Vecchio *et al.*, 2018), which may also function in oligomerization (Bornholdt *et al.*, 2013; Wijesinghe *et al.*,  
57 2017). VP40 is a peripheral protein where mVP40 lipid binding was first speculated when the protein  
58 was shown to accumulate at intracellular membranes, mostly multivesicular bodies (MVB) and late  
59 endosomes early after its synthesis in cells (Kolesnikova *et al.*, 2002; Kolesnikova, Bamberg, *et al.*, 2004;  
60 Kolesnikova, Berghofer, *et al.*, 2004). Later, the critical role of anionic lipids, phosphatidylserine (PS) and  
61 phosphoinositides (PIP) for both mVP40 and eVP40 trafficking and interactions with the plasma  
62 membrane inner leaflet have been more well established (Ruigrok *et al.*, 2000; Adu-Gyamfi *et al.*, 2013,  
63 2015; Johnson *et al.*, 2016; Oda *et al.*, 2016; Wijesinghe and Stahelin, 2016; Wijesinghe *et al.*, 2017).

64 Homo-oligomerization of the filovirus matrix protein is a key and required step for budding of  
65 virions (Nakai *et al.*, 2006; Adu-Gyamfi *et al.*, 2012b, 2015; Bornholdt *et al.*, 2013; Hilsch *et al.*, 2014;  
66 Freed, 2015; Johnson *et al.*, 2016). mVP40 and eVP40 are 34% identical in their amino acid sequence but  
67 only 16% identical in their CTDs, which gives rise to their different lipid binding selectivity. Differences  
68 in their CTDs may also contribute to differences in their oligomerization at the plasma membrane and  
69 within the cell. Indeed, mVP40 was previously described as forming large structures in cells (Timmins *et al.*,  
70 2003; Liu *et al.*, 2010) and an octameric ring was observed when only the NTD (1-186aa) was purified  
71 (Timmins *et al.*, 2003). Timmins *et al.* (Timmins *et al.*, 2003) hypothesized the paucity of distinct higher  
72 ordered mVP40 oligomeric structures was a result of the extremely high propensity of mVP40 (1-186) to  
73 oligomerize, indicated by the presence of extensive stacked rings (Timmins *et al.*, 2003). The same  
74 investigation successfully captured four distinct eVP40 oligomeric states, suggesting that mVP40 and  
75 eVP40 oligomerization may have fundamental differences (Timmins *et al.*, 2003). Furthermore, the  
76 dimeric and hexameric eVP40 crystal structures were resolved in 2013 lending significant insight to the  
77 origins of eVP40 lipid binding and oligomerization (Bornholdt *et al.*, 2013).

78 The current model of eVP40 oligomerization postulates that electrostatic interactions facilitate the  
79 disengagement of the eVP40 CTD from the NTD during matrix assembly. This disengagement sets up a  
80 conformational change which exposes two key residues within the NTD, Trp<sup>95</sup> and Glu<sup>160</sup>, as part of an  
81 oligomeric interface. In 2016, the dimeric structure of mVP40 was resolved (Oda *et al.*, 2016) revealing a  
82 conserved Trp (Trp<sup>83</sup>) and Asn (Asn<sup>148</sup>) in mVP40 that align with eVP40-Trp<sup>95</sup> and Glu<sup>160</sup> (Fig. 1A, NTD  
83 panel), respectively. In a previous study, we reported that the Trp<sup>83</sup> residue in particular was in a region  
84 that showed significant shielding during mVP40 membrane association using hydrogen-deuterium  
85 exchange-mass spectrometry (HDX-MS) analysis (Wijesinghe *et al.*, 2017), suggesting it may be  
86 important for mVP40 oligomerization following binding to anionic lipids. Furthermore, the previous work  
87 demonstrated a reduction of deuterium exchange at the CTD involving the residues Leu<sup>226</sup> and Ser<sup>229</sup> when  
88 mVP40 bound anionic membranes ((Wijesinghe *et al.*, 2017), Fig 1A). Notably, this region, dubbed  $\alpha$ -  
89 helix 4 ( $\alpha$ 4 helix) just underlies the lipid binding surface and is distinct in residue composition and in  
90 structure when compared to eVP40. Therefore, we postulated two separate oligomerization interfaces  
91 within dimeric mVP40, one involving the CTD  $\alpha$ 4 helix as well as a conserved interface in the NTD as key  
92 regulators of mVP40 oligomerization (Wijesinghe *et al.*, 2017).

93 To determine the mechanism of mVP40 oligomerization, we assessed different *in vitro* lipid  
94 binding assays with hydrogen/deuterium exchange mass spectroscopy (HDX-MS) analysis to study the  
95 effect of mutations at potential NTD and/or CTD oligomerization interfaces in mVP40 conformational  
96 changes upon binding membranes. Then, we conducted cellular studies to rationally investigate how the  
97 NTD and CTD oligomerization interfaces coordinate the matrix of mVP40 at the plasma membrane.  
98 Findings described here demonstrate that each oligomerization interface mutant displays a significant  
99 defect in VLP budding, consequence of impairment in overall and correct mVP40 trafficking and  
00 oligomerization at the plasma membrane.

## 01 Results

### 02 Effects of phospholipid membrane interaction on mVP40 oligomerization interface mutants

03 In order to better understand the origins of mVP40 oligomers in the absence of higher order  
04 mVP40 structural information, we constructed the mVP40 hexamer-hexamer interface using the eVP40  
05 hexamer-hexamer interface as the template (PDB ID: 4LDD) and performed a 100-ns molecular dynamics  
06 simulation. Fig. 1A shows the section of the mVP40 filament composed of two hexamers next to each  
07 other involving CTD-CTD interactions (Fig. S1A). To test our hypothesis that both the conserved NTD  
08 and newly identified residues in the CTD are involved in mVP40 oligomerization, we first generated  
09 several mutant constructs. These included the NTD oligomerization interface mutant by W83R/N148A and  
10 a CTD oligomerization interface double mutant L226R/S229A. Size exclusion chromatography (SEC) of  
11 purified proteins indicated that all proteins formed dimers in solution (Fig. S2).

12 To dissect changes in mVP40 residue solvent accessibility and oligomerization in the absence and  
13 presence of membranes, HDX-MS experiments were performed on mVP40 mutants incubated with  
14 liposomes containing 45% phosphatidylserine (% molar ratio) as described previously (Wijesinghe *et al.*,  
15 2017). In Fig. 1C, the ribbon map of the double mutant W83R/N148A indicates the differences in  
16 deuterium incorporation (%D) of the protein in presence of PS containing-liposomes compared to the  
17 protein alone. Overall, this double mutant showed little detectable changes in HD exchange pattern in both  
18 the NTD (from residue Met<sup>1</sup> to Lys<sup>47</sup>) and CTD (from residue Met<sup>263</sup> to Ala<sup>284</sup>). Similarly, residues Lys<sup>96</sup>-  
19 Gly<sup>106</sup> on the helix  $\alpha$ 1 and residues Gln<sup>112</sup>-Phe<sup>120</sup> on the  $\beta$ 4- $\beta$ 5 strands exhibited slightly more rapid HD  
20 exchanges. Helix  $\alpha$ 1 is involved in the dimerization of mVP40 and it had been shown previously that the  
21 HD exchange at this region is slower in presence of anionic lipid-containing liposomes (Wijesinghe *et al.*,  
22 2017). The HDX-MS profile of W83R/N148A also showed an increase of HD exchange at the  $\beta$ 6 strand  
23 (residues Glu<sup>140</sup>-Gln<sup>146</sup>) as well as in the region Met<sup>261</sup> to Gln<sup>276</sup>, which is in basic loop 2 and the  $\beta$ 10  
24 strand. Oda *et al.* (Oda *et al.*, 2016) showed that residues in this region are involved in the efficient  
25 binding of mVP40 to PS-containing liposomes. All together, these results suggest that the residues Trp<sup>83</sup>  
26 and Asn<sup>148</sup> are involved in the formation of oligomers which shields these specific regions from exposure  
27 to aqueous environment resulting in slow deuterium incorporation/exchange rates upon binding to PS-  
28 containing lipid vesicles. Furthermore, the double mutant W83R/N148A exhibited an intermediate change  
29 in deuteration level compared to wild type mVP40 (WT-mVP40) in presence or absence of zwitterionic  
30 phospholipid (Fig. S1B adapted from (Wijesinghe *et al.*, 2017)).

31 Next, we analyzed the solvent accessibility of the CTD double mutant L226R/S229A upon binding  
32 to PS-containing lipid vesicles. Similar to W83R/N148A, L226R/S229A exhibited an overall increase of  
33 the HD exchange profile compared to WT-mVP40 (Fig. S1B), except in the region including residues Ile<sup>88</sup>-  
34 Asn<sup>91</sup>. Further, no changes of the deuteration level of the  $\beta$ 6 strand (residues Glu<sup>140</sup>-Phe<sup>145</sup>) were observed  
35 for L226R/S229R compared to WT-mVP40, which showed very slow HD exchange in presence of PS-  
36 containing vesicles within the same region (Wijesinghe *et al.*, 2017). As mentioned above, L226R/S229A-  
37 mVP40 showed a faster HD exchange profile than WT-mVP40, including the following regions: i) in the  
38 NTD from residue Tyr<sup>13</sup> to Tyr<sup>44</sup> (which contains the  $\beta$ 1 strand), residues Glu<sup>73</sup>-Gly<sup>87</sup> (unstructured loop  
39 between  $\beta$ 2- $\beta$ 3 strands and the N-terminus of  $\beta$ 3 strand), Phe<sup>113</sup>-Phe<sup>120</sup> ( $\beta$ 4- $\beta$ 5 unstructured loop) and  
40 residues Ile<sup>146</sup>-Asp<sup>177</sup> (which includes the unstructured loop between helix  $\eta$ 3- $\beta$ 7 strand and the entire  $\beta$ 7  
41 strand (Fig. 1D); ii) in the CTD of mVP40, the entire region including residues Thr<sup>208</sup>-Lys<sup>264</sup>, which  
42 contains helices  $\eta$ 4 and  $\alpha$ 4, the unstructured loops between these two helices,  $\beta$ 9 strand as well as the  
43 unstructured loop  $\beta$ 9- $\beta$ 10 harboring basic loop 2, and finally the region containing the  $\beta$ 11 strand until the  
44 C-terminus (Fig. 1D). Altogether, this analysis suggests that mutation of the hypothesized CTD  
45 oligomerization interface reduces oligomerization of mVP40 in presence of PS-containing vesicles  
46 resulting in an exposure of residues at or close to the CTD of the protein.

### 47 Mutations of key residues in mVP40-NTD or CTD oligomerization interfaces alter mVP40 plasma 48 membrane localization

49 To investigate the role of the NTD and CTD oligomerization interfaces of mVP40 on the protein  
50 trafficking and binding to the plasma membrane, we performed live cell imaging of EGFP tagged WT  
51 mVP40, single mutants of each oligomerization interface, W83R and L226R, as well as the double mutants  
52 W83R/N148A and L226R/S229A (Fig. 2A-B). In agreement with previous investigation, WT-mVP40

53 primarily associates with the plasma membrane (Fig. 2A). Confocal imaging illustrated the ability of the  
54 mutant EGFP-W83R-mVP40 to traffic and localize to the plasma membrane (Fig. 2A), to a level  
55 comparable to WT-mVP40 (Fig. 2B). Additionally, W83R did exhibit elongated structures at the plasma  
56 membrane similar to WT, which corresponds to assembled VLPs. The double mutant EGFP-  
57 W83R/N148A-mVP40 exhibited similar membrane localization deficiency to monomeric mutant T105R  
58 (Fig. 2A-B). This result is consistent with previous data described in Oda et al (2016) and Koehler et al  
59 (2018). However, unlike WT-mVP40, no significant intracellular aggregations were observed in  
60 W83R/N148A expressing cells 14 hours post-transfection (Fig. 2A). Co-expression of mVP40 and  
61 mutations with mGP increased the plasma membrane localization of W83R/N148A by 11% (Fig. 2A-B).  
62 However, despite this modest increase in plasma membrane localization, no elongated tubulations were  
63 detected on the surface of transfected cells (Fig. 2A), which are abundant on cells expressing WT-mVP40  
64 (in absence or presence of mGP, see Fig. 2A top left panel). These observations may indicate the  
65 requirement of an interaction with both Trp<sup>83</sup> and Asn<sup>148</sup> residues within the NTD oligomerization  
66 interface for efficient membrane localization of the protein and assembly into VLPs.

67 In contrast, the single mutant EGFP-L226R-mVP40 showed a non-significant decrease in plasma  
68 membrane localization in both the presence and absence of mGP co-expression (Fig. 2A-B). However, the  
69 double mutant EGFP-L226R/S229A-mVP40 had a more pronounced and significant reduction in  
70 localization at the plasma membrane compared to WT-mVP40, (25% reduction) (Fig. 2A-B). These  
71 observations may suggest collaborative interactions at the CTD between L226 and S229 to ensure normal  
72 plasma membrane enrichment of mVP40. Both the L226R and L226R/S229A mutants were still able to  
73 form filamentous protrusions at the plasma membrane. Furthermore, co-expressing the CTD  
74 oligomerization interface double mutant L226R/S229A with mGP appeared to fully recover the wild type  
75 phenotype (Fig. 2A-B). Taken together, these results indicate that the residues involved in NTD  
76 oligomerization interface are essential to matrix assembly at the plasma membrane for the elongation of  
77 VLPs while the CTD oligomerization interfaces may be required for efficient trafficking and binding of  
78 mVP40 to the plasma membrane of mammalian cells. This was further supported by the lack of reduction  
79 in deuterium exchange for L226R/S229A in regions of membrane binding previously mapped for mVP40  
80 (Oda *et al.*, 2016; Wijesinghe *et al.*, 2017). As a control, we also analyzed the monomeric mVP40 mutant  
81 T105R that had been shown to exhibit diffused signal in the cytosol (Oda *et al.*, 2016). As expected,  
82 EGFP-T105R-mVP40 failed to translocate to the plasma membrane (Fig. 2A-B).

### 83 *mVP40-NTD oligomerization interface mutations abolish the ultrastructure of VLP at the plasma* 84 *membrane*

85 For a clearer understanding of the role of each oligomerization interface in mVP40  
86 multimerization and assembly at the host plasma membrane, we performed transmission electron  
87 microscopy (TEM) imaging of the W83R/N148A double mutant and L226R single mutant. We chose  
88 these two mutants because of their altered phenotypes in cells and because we observed highly similar  
89 VLP structures in the L226R and L226R/S229A expressing cells from live confocal imaging (Fig 2A, left  
90 panel). To ensure we only evaluated cells expressing mVP40, we performed a novel ascorbate peroxidase-  
91 tagging (APEX) TEM method which utilizes the co-expression of EGFP-tagged proteins with GFP binding  
92 protein (GBP) fused to APEX2 (GBP-APEX2) (Ariotti *et al.*, 2015). Upon co-expression of GBP-APEX2  
93 with GFP-mVP40 proteins, GBP-APEX binds to the EGFP tag on mVP40. During TEM processing,  
94 APEX2 catalyzes the conversion of diaminobenzidine (DAB) into a precipitate that deposits at the site of  
95 the GBP-APEX2:GFP interaction. Following chemical fixation, the precipitate allows a specific and  
96 localized signal of EGFP-mVP40 localization with high contrast for TEM imaging.

97 First, we tested the ability of WT-mVP40 to translocate to the plasma membrane and to form the  
98 typical elongated structure of VLPs in cells co-transfected with EGFP-WT-mVP40 and GBP-APEX2. As  
99 shown in Fig. S3B and Fig. S3C, the co-expression of the two constructs resulted in normal VLP  
00 protrusions from the plasma membrane. To validate this observation, we compared post-stained cells  
01 expressing EGFP-WT-mVP40 alone (Fig. S3A, S3D) to cells expressing both EGFP-WT-mVP40 and  
02 GBP-APEX2 (Fig S3B, S3E) and found that VLP structures between both conditions were  
03 morphologically indistinguishable. We also assessed if post-staining APEX2 expressing cells could enrich  
04 the contrast detected for TEM, as post-stain enhances membrane staining for organelle identification,  
05 therefore we compared cells expressing GBP-APEX2 and EGFP-WT-mVP40 with and without post-stain.

06 Cells that did not receive post-stain yielded superior APEX2 signal at the membrane of the cell and the  
07 VLP membranes where mVP40 is enriched (Fig. S3B, S3E) compared to post-stained APEX cells (Fig.  
08 S3C, S3F). The post-stain appeared to introduce artifacts at the plasma membrane which could alter our  
09 observations and analysis. Therefore, we decided to continue our investigations of mVP40 mutants co-  
10 expressed with GBP-APEX2 without any post-stain processing.

11 Fig. 2C and 2D are representative micrographs of cells co-expressing GBP-APEX2 and EGFP-  
12 W83R/N148A or EGFP-L226R-mVP40, respectively. The APEX2 signal from EGFP-W83R/N148A  
13 mutant was more distributed within the cell (Fig. 2C) with some distinct puncta at the membrane and  
14 across some tubulations (Fig. 2E) that may correspond to accumulated mVP40. However, the mutant did  
15 not show characteristic VLP structures found at the plasma membrane of WT-mVP40 (Fig. 2G top image)  
16 but instead moderate APEX2 signal in ruffled membranes (Fig. 2G middle image). On the other hand,  
17 APEX2 signal from EGFP-L226R mutant was located at the cell periphery (Fig. 2D) and was detected  
18 inside VLP structures (Fig. 2F). Also, no major defect in the ultrastructure of the VLPs was observed in  
19 this mutant although their abundancy at the plasma membrane was possibly different (Fig. 2G bottom  
20 image). Taken together, this analysis corroborated our confocal imaging results where the mutations of  
21 residues within the NTD oligomerization interface impaired the accumulation of mVP40 at the plasma  
22 membrane and the proteins ability to assemble and form VLPs unlike the mutation within the CTD  
23 oligomerization interface.

#### 24 Plasma membrane fluidity exhibits a different profile upon binding of mVP40 variants

25 We hypothesized that membrane fluidity changes may be important for proper mVP40 matrix  
26 assembly and virus particle elongation and that mVP40 oligomerization may facilitate this process. To test  
27 this, we employed a laurdan fluidity imaging assay of cells expressing the different EGFP-mVP40 variants  
28 (or EGFP plasmid as a control) (Fig. S4). Laurdan is a fluorescent hydrophobic probe that penetrates cell  
29 membranes and aligns parallel to the phospholipid tails (Bagatolli *et al.*, 2003). In ordered or rigid  
30 membranes with a highly hydrophobic environment, the probe has a peak emission wavelength of  $\approx$  440  
31 nm. However, in fluid membranes water molecules adjacent to the glycerol backbone induce dipolar  
32 relaxation of laurdan, resulting in a spectral shift in the emission wavelength to  $\approx$  500 nm (Gaus *et al.*,  
33 2006). Changes in membrane fluidity can then be measured by a normalized ratio of the two emission  
34 regions, and is called the general polarization (GP) index (which ranges between -1 and 1, for fluid to rigid  
35 membranes, respectively) (Bagatolli *et al.*, 2003).

36 The analysis of laurdan fluorescence was performed under a two-photon confocal microscope and  
37 we focused the analysis on cells with the largest enrichment of mVP40 at the plasma membrane (Fig. S4,  
38 bottom panels). The GP index shifted from 0.15 at the plasma membrane of HEK293 cells expressing  
39 EGFP to  $\approx$  0.4 at the plasma membrane of EGFP-WT-mVP40 expressing cells (Fig. 2H). This  
40 observation suggests that the binding and assembly of mVP40 at the plasma membrane increases  
41 membrane rigidity. Next, to investigate the role of different oligomerization processes during the matrix  
42 assembly at the plasma membrane on its fluidity, we analyzed the GP index of NTD and CTD  
43 oligomerization interface mutants compared to WT-mVP40 (Fig. 2I, 2J). Expression of W83R in cells did  
44 increase membrane rigidity compared to EGFP alone (GP index  $\approx$  0.25 in W83R expressing cells), albeit to  
45 a lesser extent than WT (Fig. 2I). Interestingly, the double mutant W83R/N148A had a comparable effect  
46 as WT on the plasma membrane rigidity, with a GP index of  $\approx$  0.45 in W83R/N148A expressing cells  
47 (Fig. 2I). Conversely, L226R and L226R/S229A mutants exhibited exactly the same GP ( $\approx$  0.15) as  
48 EGFP expressing cells (Fig. 2J), indicating their association with membranes does not change membrane  
49 fluidity. All together, these data suggest that the membrane rigidity observed in the wild type is a result of  
50 CTD-CTD oligomerization of the virus matrix at the plasma membrane.

#### 51 Mutation of mVP40 at hypothesized oligomerization NTD interfaces drastically reduced mVP40 52 oligomerization in cells

53 To confirm a defect in the matrix assembly upon NTD and CTD oligomerization interface  
54 mutations, we assessed cellular mVP40 oligomerization analysis through Number & Brightness (N&B)  
55 analysis. N&B is a method used to analyze the assembly state of proteins in real-time based on the  
56 variance of the intensity within single pixels over time (Digman *et al.*, 2008). Moreover, this technique has  
57 been used to evaluate viral matrix protein oligomerization (Adu-Gyamfi *et al.*, 2015; Johnson *et al.*, 2016).

58 To determine the brightness value for a monomer, GFP was expressed in HEK293 cells. To determine the  
59 brightness value of higher ordered oligomeric states of GFP-mVP40 constructs expressed in HEK293  
60 cells, multiples of the EGFP monomer brightness value were extrapolated to the corresponding oligomeric  
61 states. Pixel intensities correlating to monomer-hexamer (red), hexamer-12mer (green), 12mer-24mer  
62 (blue), and >24mer (pink) oligomeric states of mVP40 were analyzed, mapped onto the original composite  
63 image of the cell and plotted as a percent of total pixels in the image (See Fig. S5A). The oligomerization  
64 profile of EGFP-WT-mVP40 revealed the largest population of mVP40 was in the monomer-hexamer  
65 assembly state (~52.62% total pixels, Fig. 3A, Table S2, Fig. S5A). Importantly, each higher ordered  
66 oligomeric state was roughly equally represented (from ~13% to 19.1% total pixels, Fig. 3A, Table S2,  
67 Fig. S5A).

68 Analysis of the oligomerization profile of each EGFP-mVP40 mutant differed from the WT  
69 oligomerization profile. In the NTD oligomerization interface mutant W83R, we noted a reduction of  
70 ~10% in large oligomers >24mer (from 19.1% to 9.68%) with a non-significant but proportional increase  
71 of 8% in monomer-hexamer (from 52.62% to 60.7%) and ~ 6% in hexamer-12mer (from 13.58% to  
72 19.04%) (Fig. 3A, Table S2, Fig. S5A). A similar but more significant pattern was observed for the double  
73 mutant W83R/N148A, where a significant increase in monomer-hexamer was observed (~29% increase  
74 from 52.62% to 81.15%) concomitantly with a notable decrease of ~16% in oligomers >24mer (decreased  
75 from 19.1% to 2.8%) (Fig. 3A, Table S2, Fig. S5A). Given these findings, this analysis demonstrated that  
76 the mutants have an impaired ability to form large oligomers and accumulated at the plasma membrane in  
77 small oligomers. Unfortunately, this experiment could not provide further information on the ability of the  
78 mutants to form a hexamer through NTD-NTD oligomerization. In contrast, CTD oligomerization  
79 interface mutants did not exhibit a drastic change in their oligomerization profile compared to WT except  
80 for a slight decrease in oligomers >24mer (~12% and ~10% reduction for L226R and L226R/S229A,  
81 respectively) and modest increase of monomer-hexameric structures (~11% and ~ 7.5% increase for  
82 L226R and L226R/S229A, respectively) (Fig. 3A, Table S2, Fig. S5A). In brief, CTD oligomerization  
83 interface mutants have a smaller effect on the ability of the protein to form large oligomers >24mer that  
84 may involve other residues and may have a compensatory effect. The monomeric and nonfunctional  
85 T105R mutant was used as control and did not show any detectable oligomerization (Fig. 3A, Table S2,  
86 Fig. S5A). Altogether, these results support our hypothesis of a potential oligomerization interface in the  
87 NTD required for efficient mVP40 matrix assembly and virus budding.

#### 88 NTD oligomerization deficient mVP40 mutants fail to produce VLP

89 To understand the functional significance of mVP40 oligomerization deficient mutants, functional  
90 budding assays of HEK293 cells expressing EGFP-mVP40 variants were performed. We hypothesized that  
91 mVP40 mutants with aberrant oligomerization would fail to produce VLPs. Additionally, an interaction  
92 between mGP and mVP40 has been previously reported (Kolesnikova *et al.*, 2007), therefore, co-  
93 expression of mGP and mVP40 was performed for some of the functional budding assays. Robust VLP  
94 production was observed for cells expressing WT-mVP40, with a slight increase in VLP production when  
95 WT-mVP40 was co-expressed with mGP (Fig. 3B, 3C). Both NTD oligomerization interface mutants lost  
96 their ability to release VLPs as described previously in (Oda *et al.*, 2016) and (Koehler *et al.*, 2018), even  
97 in the presence of mGP (Fig. 3B, 3C). These results demonstrated that despite the ability of W83R and  
98 W83R/N148A mutants to bind and form small oligomers at the plasma membrane, their deficient ability to  
99 form large oligomers results in an inability to release VLPs. On the other hand, CTD oligomerization  
00 interface mutants had a reduction of VLP release of ~40 % for L226R (in the presence and absence of  
01 mGP), and of ~25% for the double mutant L226R/S229A in the absence of mGP. Interestingly, co-  
02 expression of L226R/S229A with mGP resulted in an even more profound reduction in VLP production  
03 compared to WT (~40% reduction) than when L226R/S229A was expressed alone (Fig. 3B, 3C). The  
04 APEX2 TEM analysis of VLP structures at the plasma membrane of the L226R mutant did not show a  
05 significant morphological defect (Fig. 2F, 2G bottom image), however, the functional budding assay  
06 suggests a defect in efficient scission from the plasma membrane to form VLPs. Taken together, these  
07 observations highlight the importance of the L226 and S229 residues in the CTD oligomerization interface  
08 to ensure a functional mVP40, despite the ability of these mutants to multimerize and form a matrix and  
09 elongate at the plasma membrane, albeit to a lesser extent than WT. This also underscores the importance  
10 of CTD-CTD mediated changes in membrane rigidity, which may be an important step in the proper

11 matrix layer formation for effective scission. The monomeric nonfunctional T105R mutant was used as  
12 control of budding deficiency and failed to produce VLPs (Fig. 3B, 3C).

### 13 Oligomerization profiles of wild type mVP40 at the surface of GUVs depends on the anionic lipid 14 compositions

15 The oligomerization profile in cells of mVP40 variants did not provide adequate details  
16 concerning the profile of small oligomers at the plasma membrane. This may be due to non-bound proteins  
17 in the cytosol that may make the distinction of pixel intensities correlating to monomer-dimer from the one  
18 correlating to dimer-hexamer, in addition to intracellular factors that could also promote protein  
19 oligomerization. In order to address this point, we performed N&B analysis on purified 6xHis-mVP40  
20 proteins incubated with giant unilamellar vesicles (GUVs) and this analysis required a fluorescent protein.  
21 For this purpose, we first attempted to conjugate dimeric 6xHis-mVP40 through its unique cysteine residue  
22 (Cys<sup>58</sup>) using maleimide-AlexaFluor conjugated dye. However, we were unable to conjugate efficiently  
23 mVP40 despite multiple attempts (data not shown), which is likely due to the low structural accessibility  
24 of this residue to solvent. Alternatively, we used a (Ni)-NTA-Atto550 conjugate probe that is specific for  
25 poly-histidine tags with minimal cross reactivity (You and Piehler, 2014).

26 Previously, Wijesinghe & Stahelin (Wijesinghe and Stahelin, 2016) demonstrated that mVP40  
27 associated non-specifically with the anionic lipids within the plasma membrane (e.g. PS and PIPs). Here,  
28 we aimed to understand the oligomerization profile of mVP40 during virus matrix assembly at the plasma  
29 membrane of infected cells, the building block of the virus particles. For this reason, we used the well-  
30 established giant unilamellar vesicle (GUV) assay, which allows tailored lipid compositions with the  
31 ability to incorporate small amounts of fluorescent lipids for visualization. Thus, using the GUVs, we are  
32 able to selectively determine binding and oligomerization of mVP40 in the presence of PS, PI(4,5)P<sub>2</sub>  
33 and/or both. Confocal imaging was performed to ensure the Ni-NTA-Atto550/His-WT-mVP40 bound  
34 efficiently to the GUVs (Fig S5B, composite panels). Then, we determined the brightness value for the  
35 monomeric Ni-NTA-Atto550 dye. Thus, we performed confocal microscopy imaging of WT-mVP40  
36 proteins incubated with different GUV compositions followed by N&B analysis (Fig. 3D-3E; brightness  
37 plots in Fig. S5B). Only pixels detected at mVP40-enriched GUV membranes were analyzed and  
38 normalized to the total amount of pixels detected to estimate the oligomeric distribution across the *in vitro*  
39 membrane.

40 This analysis demonstrated for the first time that mVP40 protein oligomerization profiles depend  
41 on the lipid composition of the membrane. Indeed, WT-mVP40 is able to bind PS:PI(4,5)P<sub>2</sub> containing  
42 GUVs, where ~25% of the total pixel counts corresponded to membrane bound mVP40 (Fig 3D) and more  
43 than 60% of the bound protein formed approximately equal population of dimer-hexamer and hexamer-  
44 12mer at the vesicle membrane (30.29 and 31.44%, respectively, Table S3). For the remaining fraction of  
45 mVP40 membrane bound, ~17.7% was monomer-dimer and ~16% was of 12mer-24mer. Finally, 4.43 %  
46 of total bound mVP40 were very large oligomers, >24mer. Furthermore, in PS-containing GUVs, WT-  
47 mVP40 was detected mostly as small oligomers with an abundance of monomer-dimer (~53% total bound  
48 protein, Table S3) and dimer-hexamer (~37% total bound protein). However, only a small population of  
49 hexamer-12mer was detected (~9.4%) and no larger oligomers could be detected (>12mer) without  
50 PI(4,5)P<sub>2</sub> in the GUVs. This first analysis suggests that both PS and PI(4,5)P<sub>2</sub> are required for mVP40 to  
51 form larger oligomers and assemble the viral matrix. Moreover, in PI(4,5)P<sub>2</sub> containing GUVs, a small  
52 population of pixels at the membrane of the GUV were detected, this may explain the low abundance of  
53 negative charge at the surface of the membrane (20% of total charge) compared to the previous liposomes  
54 compositions, 50% and 30% respectively (Wijesinghe and Stahelin, 2016). Overall, □ 56.5% of the bound  
55 protein was monomer-dimer, 24.72% as dimer-hexamer, 14.25% as hexamer-12mer and 4.25% 12mer-  
56 24mer while no >24mer could be detected (Fig. 6A, Table S3). This result indicates that PI(4,5)P<sub>2</sub> may  
57 promote mVP40 to form larger oligomers (over than 12mer), which requires the presence of PS in the  
58 GUVs. To summarize, this analysis demonstrated a different oligomerization profile of mVP40 depending  
59 on the lipid composition of vesicle membrane, where both PS and PI(4,5)P<sub>2</sub> are required for large VP40  
60 oligomers suggesting that PS is sufficient to promote small VP40 oligomers such as hexamers while  
61 PI(4,5)P<sub>2</sub> is likely involved in promoting or stabilizing hexamer-hexamer interactions.

### 62 In vitro oligomerization of mVP40 is altered upon mutation of key residues

63 To investigate the effect of NTD and CTD oligomerization interface mutations on *in vitro*  
64 oligomerization, we performed N&B analysis using 6xHis-W83R/N148-mVP40 and 6xHis-L226R-  
65 mVP40 purified proteins. We confirmed by size exclusion that these two mutants formed the dimer (Fig.  
66 S2) indicating that the mutations had no effect on the dimerization of the protein. Also, we decided to  
67 continue our investigations using only these mutants as W83R/N148A had a more profound phenotype in  
68 cells compared to W83R and due to L226R and L226R/S229R displaying similar phenotypes in cells  
69 (aside from impaired plasma membrane binding of L226R/S229R). First, we compared the oligomerization  
70 profiles of both W83R/N148A and L226R on GUVs that contained both PS and PI(4,5)P<sub>2</sub> (Fig. 3E, Table  
71 S3). W83R/N148A showed efficient binding to the GUV membranes; however large oligomer formation  
72 was significantly reduced (Fig. 3E, Table S3). In this analysis, a small population of pixels was detected at  
73 mVP40-enriched GUV membranes (6.62 % total pixels). Because we focused this analysis on mVP40  
74 enriched GUVs, it is important to note that this small population of pixels detected did not suggest a defect  
75 of binding to the GUV membrane. The distribution of mVP40 consisted of 13.31% of the total bound  
76 protein profile as monomer-dimer, 30.29 % dimer-hexamer, 33.31% hexamer-12mer, 20.7% for 12-  
77 24mers, and 2.17% for oligomers >24mer, of total bound protein (Fig. 3E, Table S3). The major  
78 differences between this NTD mutant and the WT oligomerization profile is the increase of hexamer-  
79 12mer and 12mer-24mer population in the W83R/N148A mutant compared to the WT (Fig 3D, 3E, Table  
80 S3). Additionally, L226R displayed a unique oligomerization profile where the most abundant structures  
81 were dimer-hexamer, with over 51% of total bound protein (14.02% total pixels) at the membrane of GUV  
82 containing PS:PI(4,5)P<sub>2</sub> (Fig. 3E, Table S3). The other oligomers, in contrast to WT and the NTD mutant,  
83 exhibited a decrease in their abundance with 13.15% monomer-dimer, 23.77% hexamer-12mer and 8.37%  
84 of 12mer -24mer. This result strongly supports our hypothesis that the  $\alpha$ 4 helix and residue Leu<sup>226</sup> plays a  
85 critical role in oligomerization by facilitating CTD-CTD interaction to expand the matrix from a hexamer  
86 to larger filaments *in vitro*.

87 We next extended our investigations into the role of specific lipids in facilitating mVP40  
88 oligomerization at both the NTD and CTD oligomerization interfaces by performing N&B using  
89 W83R/N148A and L226R on GUVs that contained only PS or only PI(4,5)P<sub>2</sub> (Fig. S5C, S5D). First, we  
90 observed that both mutants displayed a high abundance at the PS-containing membrane as a monomer-  
91 dimer, 79.49% and 69.07% of total bound protein, respectively. In contrast, a reduction of other oligomers  
92 was observed for W83R/N148A and L226R with dimer-hexamer (18.78% and 25.11%, respectively) and  
93 hexamer-12mer (1.73% and 5.72%, respectively) (Fig. S5C, Table S3). Neither WT-mVP40 or either  
94 mutant were able to form larger oligomers on PS only GUVs (Fig. 3D, Table S3, Fig. S5C); however, the  
95 oligomerization profile of W83R/N148A was notably defective compared to both WT and L226R on PS  
96 only GUVs.

97 We next performed N&B using GUVs with only PI(4,5)P<sub>2</sub>. Using PI(4,5)P<sub>2</sub> vesicles we  
98 demonstrated that the W83R/N148A mutant had a comparable oligomerization profile to WT, with a small  
99 increase of hexamer-12mer population from 14.25% in the WT to 16.25% in the mutant. W83R/N148A  
00 also exhibited a depletion of the >24mer population with less than 1% of total bound protein (Fig. S5D,  
01 Table S3). The single mutant, L226R, showed a high enrichment at the membrane of PI(4,5)P<sub>2</sub>-containing  
02 GUVs, where □ 22% of total pixels corresponded to bound mVP40, compared to 8.89% for the WT and  
03 11.73% for W83R/N148A, and a higher population of dimer-hexamer with 28.87% of total bound protein  
04 (24.72% and 26.36% for WT and W83R/N148A, respectively) (Fig. S5D, Table S3). The other oligomers  
05 detected for the L226R mutant were 45.49% of monomer-dimer, 17.45% of hexamer-12mer, 6.04% of  
06 12mer-24mer and 2.12% of >24mer of total bound protein (Fig. S5D, Table S3). The monomeric mVP40  
07 mutant T105R and 6xHis-tag were used as controls for no binding and oligomerization on GUV  
08 membranes (Fig. S5C, S5D, Table S3). Taken together, we demonstrated that both W83R/N148A and  
09 L226R mutants exhibited oligomerization profiles that are consistent with the role of the mutated residues  
10 in mVP40 matrix assembly, where CTD oligomerization interface mutant L226R displayed an  
11 accumulation of dimer-hexamer population in both PI(4,5)P<sub>2</sub> and PS:PI(4,5)P<sub>2</sub>-containing vesicles; on the  
12 other hand, NTD oligomerization interface double mutant W83R/N148A accumulated mostly as  
13 monomer-dimer at PS-containing membranes with a deficiency to form other oligomers.

14 Association with anionic lipids is not altered in mVP40 oligomerization interface mutants



15 To assess the effect of NTD and CTD interface mutations on the ability of mVP40 to bind  
16 PS:PI(4,5)P<sub>2</sub>-containing membranes *in vitro*, a liposome sedimentation assay was performed. A  
17 representative Western blot is shown in Fig. 3F and quantified results from densitometry analysis are  
18 shown in Fig. 3G. LUVs were prepared containing either no anionic lipids (control membranes) or with  
19 30% PS and 2.5% PI(4,5)P<sub>2</sub> (anionic membranes). This assay showed a clear ability of all proteins to  
20 efficiently bind anionic membranes with no detectable binding to control membranes (Fig. 3F, 3G). The  
21 monomeric T105R mutant was used as a control and lacked detectable binding to membranes (Fig. 3F, 3G)  
22 demonstrating the necessity of the intact dimer in binding anionic membranes as previously reported (Oda  
23 *et al.*, 2016). This suggests that both NTD and CTD oligomerization interfaces are not involved in mVP40  
24 binding to anionic phospholipid-containing membranes and that observations from orthogonal experiments  
25 are not a result of an inability of the protein to associate with PS or PI(4,5)P<sub>2</sub> containing membranes or the  
26 plasma membrane.

### 27 NTD/CTD oligomerization interfaces triple mutant displayed a unique profile

28 To deepen our understanding of the oligomerization process of mVP40 and the role of both NTD  
29 and CTD oligomerization interfaces in this process as well as in the viral matrix assembly, we generated a  
30 6xHis-mVP40 triple mutant of both the NTD and CTD oligomerization interfaces ((W83R, N148A and  
31 L226R (WNL-mVP40)). SEC of purified protein indicated that the triple mutant formed a dimer in  
32 solution (Fig. S2). HDX-MS analysis was performed with membranes as described above (Fig. 4A) and  
33 demonstrated that WNL displayed an overall decrease of HD exchange compared to WT-mVP40 except  
34 for four regions: C-terminal region of  $\beta$ 2 strand (Ile<sup>66</sup>-Ser<sup>70</sup>),  $\beta$ 6 strand (residues Glu<sup>140</sup>-Phe<sup>145</sup>), N-terminal  
35 region of  $\beta$ 7 strand (residues Leu<sup>167</sup>-Val<sup>171</sup>) and basic loop-2 with the  $\beta$ 10 strand (residues Lys<sup>265</sup>-Gln<sup>276</sup>).  
36 However, the two last regions had an increased rate of HD exchange at longer time points. On the other  
37 hand, some regions showed a slower HD exchange than WT, which included residues Ala<sup>71</sup>-Arg<sup>75</sup> in the  
38 loop region between the  $\beta$ 2 and  $\beta$ 3 strands, residues Tyr<sup>162</sup>-Asn<sup>166</sup> within the  $\beta$ 7 strand, the residues  
39 constituting helix  $\alpha$ 3 (Lys<sup>183</sup>-Ile<sup>187</sup>), residues Ile<sup>249</sup>-Val<sup>259</sup> found in the  $\beta$ 9 strand and the N-terminal region  
40 of the basic loop-2 and residues Asn<sup>280</sup>-Tyr<sup>295</sup> in the unstructured loop between the  $\beta$ 10 and  $\beta$ 11 strand  
41 (Fig. 4A). Other regions displaying low HD exchange at longer time points included residues in  
42 unstructured loops, Tyr<sup>157</sup>-Asn<sup>166</sup> (unstructured loop between  $\eta$ 3 and N-terminus of  $\beta$ 7 strand), Tyr<sup>208</sup>-  
43 Arg<sup>226</sup> (unstructured loop between  $\eta$ 4 and helix  $\alpha$ 4) and Leu<sup>235</sup>-Lys<sup>239</sup> (unstructured loop helix  $\alpha$ 4- $\beta$ 9  
44 strand). Taken together, this analysis provides insight into a potential stable structure rearrangement or  
45 oligomerization of W/N/L-mVP40 in presence of PS-containing vesicles that display a slow HD exchange  
46 compared to WT and previously analyzed mutants.

47 To test this hypothesis and determine the ability of the triple mutant to oligomerize in the presence  
48 of anionic lipids, we conducted an *in vitro* oligomerization assay with the water soluble chemical  
49 crosslinker BS<sup>3</sup> (Fig. 4B). WT and W/N/L proteins exhibited no oligomerization with control lipids (no  
50 anionic lipids) as expected and only the dimer and monomer were detected (Fig. 4B, lane 1). WT-mVP40  
51 displayed different oligomers without predominance of specific molecular sizes in 40% PS containing  
52 membrane as well as 7.5% PI(4,5)P<sub>2</sub> (Fig. 4B, lanes 2 and 3). However, in membranes containing  
53 PS:PI(4,5)P<sub>2</sub> (20:5% mol), a band at a molecular weight >250 kDa was more obvious (Fig. 4B, lane 4, blue  
54 asterisk). The same profile was also observed in membranes containing equivalent percentage of negative  
55 charge (10% PI(4,5)P<sub>2</sub> that corresponds to ~40% negative charge) with also a small increase of a band  
56 between 150 and 250 kDa (Fig. 4B, lane 5, blue asterisk). According to our estimation, these two bands  
57 may correspond to: ~206 kDa (hexamer) and ~143 kDa (tetramer), respectively. Concerning the WNL-  
58 mVP40 triple mutant, the band at ~206 kDa that may correspond to the hexameric mVP40 form was  
59 detected clearly in the 4 different anionic membrane conditions (Fig. 4B lanes 2-5, blue asterisk). This data  
60 suggests that WNL-mVP40 is most likely forming a new and unique structure in presence of anionic  
61 membranes as a result of the three mutations. Furthermore, WNL-mVP40 had a similar ability to bind PS-  
62 PI(4,5)P<sub>2</sub> membranes compared to WT-mVP40, as shown in the liposome sedimentation assay (Fig. 4C,  
63 4D). As expected, WNL-mVP40 did not bind control membranes (neutral) but showed a normal binding to  
64 anionic membranes indicating that the triple mutation did not affect the lipid binding efficiency of the  
65 protein.

66 To assess the abundance of particular oligomers of WNL-mVP40 in the presence of anionic  
67 membranes, we performed *in vitro* N&B analysis with GUVs as described above. The data is summarized

68 in Fig. 4D and Table S3 with respect to the oligomerization profile of WNL-mVP40 in the presence of  
69 different negatively charged membranes while Fig. 4E shows the ability of the mutant to bind and enrich  
70 efficiently at PS:PI(4,5)P<sub>2</sub> membranes (composite panel). In these analyses, we demonstrated that ~13% of  
71 total pixels detected were enriched protein at the membrane of the GUVs containing either PS:PI(4,5)P<sub>2</sub> or  
72 PI(4,5)P<sub>2</sub> only. However, the oligomerization profiles of the protein were different in the two lipid  
73 membranes. In short, PS:PI(4,5)P<sub>2</sub> bound protein formed mostly hexamer-12mer (~37.8% of total bound  
74 protein), 30.88% dimer-hexamer, 17.4% 12-24mer, 11.36% monomer-dimer and about 3.4% were larger  
75 oligomers (>24mer, Fig. 4D, 5F). On the other hand, on PI(4,5)P<sub>2</sub>-containing membranes, WNL-mVP40  
76 was mostly abundant as monomer-dimer with about 57.7% of total bound protein, ~27.66% dimer-  
77 hexamer, 11.57% hexamer-12mer, ~2.4% 12mer-24mer and a very small population could be detected as  
78 >24mer (less than 1%). Furthermore, the same analysis was performed with PS-containing membranes,  
79 and as expected, the mutant displayed mostly a monomer-dimer profile at the GUV membrane with more  
80 than 79% of total bound protein, 18% were dimer-hexamer and 2.3% were hexamer-12mer (Fig. 4D). All  
81 together, these analyses indicate that WNL-mVP40 exhibited an oligomerization profile comparable but  
82 more exaggerated to the NTD oligomerization interface mutant W83R/N148A-mVP40 (Fig. 3E; 4D).  
83 Altogether, *in vitro* analysis of NTD/CTD oligomerization interfaces demonstrate they are not involved in  
84 the ability of mVP40 to bind anionic membranes, however, both the NTD and CTD interfaces are required  
85 for efficient protein oligomerization at the membrane and matrix assembly.

#### 86 NTD/CTD oligomerization interfaces triple mutant is unable to localize and oligomerize at the plasma 87 membrane

88 Next, we generated an EGFP tagged triple mutant of both NTD and CTD oligomerization  
89 interfaces (EGFP-WNL-mVP40) to expand on the involvement of these two interfaces in plasma  
90 membrane localization. As shown in Fig. 5A, the triple mutant was unable to localize to the plasma  
91 membrane similarly to the monomeric mutant T105R (Fig. 2A), which was corroborated by the  
92 quantitative analysis (Fig. 5B). Furthermore, the VLP budding efficiency was tested by functional budding  
93 assays and indicated that W/N/L-mVP40 was unable to bud from the plasma membrane (Fig. 5C, 5D). In  
94 both assays, co-expressing the mutant with mGP did not rescue the WT phenotype (Fig. 5A bottom panel,  
95 Fig. 5C, 5D) indicating that the trafficking and stabilization at the plasma interface was highly dependent  
96 on the oligomerization efficiency of mVP40. To confirm that WNL-mVP40 is unable to oligomerize at the  
97 plasma membrane, we performed N&B analysis in living cells. Figure 5E and 5F revealed that  
98 oligomerization of WNL was abrogated, where hexamer-12mer represented only 3.52%, 12mer-24mer  
99 1.05% and >24mer 0.21% of total pixels detected. Likewise, a significant increase in monomer-hexamer  
00 was observed with up to 95% of the total pixels (Fig. 5F, Table S2). Taken together, this analysis supports  
01 the requirement of both NTD and CTD oligomerization interfaces for the correct and efficient binding of  
02 mVP40 to the plasma membrane of host cells and productive homo-oligomerization to form the viral  
03 matrix needed for VLP budding. Based on this phenotype, it was of our interest to know if W/N/L  
04 mutations had an effect on plasma membrane fluidity. Laurdan imaging analysis described in Fig. 5G  
05 (images in Fig. S4) highlighted the ability of WNL-mVP40 to induce a mild increase of rigidity at the  
06 plasma membrane, albeit slightly less than WT-mVP40. Interestingly, the phenotype was identical to the  
07 monomer mutant T105R-mVP40 with a GP index about 0.3. These data suggest that cellular expression of  
08 mVP40 may affect the plasma membrane lipid composition or distribution even before mVP40 resides  
09 there.

10 During our analysis of WNL-mVP40, we observed intracellular vesicular structures within  
11 transfected cells and rarely, the protein able to reach the plasma membrane (data not shown). To  
12 investigate these observations further, TEM analysis on cells co-expressing EGFP-WNL-VP40 with GBP-  
13 APEX2 was performed. Figure 5H-K is a representative micrograph of cells co-expressing W/N/L-mVP40  
14 and GBP-APEX2. Trace levels of APEX2 signal were detected at the cell periphery (Fig. 5H, 5J).  
15 However, a large accumulation of APEX2 signal was observed in the cytosol (Fig. 5H, 5I, 5K). A similar  
16 accumulation was observed previously for WT-mVP40 (Koehler *et al.*, 2018) in addition to our TEM  
17 experiments (Fig. 5H) and confocal imaging (data not shown). In Figure 5H, we compared the structure of  
18 the intracellular accumulations in both WT (top panel) and WNL-mVP40 (middle and bottom panels). We  
19 noted that these protein accumulations were more abundant, larger and less structured in the triple mutant  
20 compared to WT.

21 At this point it was necessary to examine whether the triple mutant displayed a specific  
22 oligomerization profile in cells and not only at the plasma membrane. For this purpose, we performed a  
23 size exclusion (SEC) assay on protein extract from cells expressing either EGFP-WT-mVP40, or EGFP-  
24 WNL-mVP40 as described previously (Liu *et al.*, 2010). Monomeric EGFP alone was used as a control of  
25 a protein that does not oligomerize. In brief, cells transiently expressed different constructs for 24 hours  
26 and proteins were extracted in 1% triton X-100 prior to separation by SEC (Fig. 5L-N). Internal molecular  
27 weight standards were also used for molecular weight estimation (Fig. 5M). EGFP-WT-mVP40 was  
28 detected in different fractions that correspond to the peaks at elution volumes 12.5 to 13.5 ml and 14 to 15  
29 ml (Fig. 5N). These peaks likely correspond to dimeric and monomeric forms, respectively. In addition, a  
30 very small amount of protein was detected at elution volumes 10.5 to 11.5 ml that should correspond to  
31 larger oligomers, most likely hexamers. In contrast, EGFP-WNL-mVP40 was detected predominantly in  
32 fractions at elution volumes 8.5 to 10 ml along with elution volumes from 12.5 to 13.5 ml and 14 to 15 ml,  
33 corresponding most likely to larger homo-oligomeric, dimeric and monomeric forms (Fig. 5N).  
34 Interestingly, the protein was also detected in the void volume (elution volume 7 ml), which may indicate  
35 the presence of very large oligomers or aggregates (Fig. 5N). These data suggest that the NTD/CTD  
36 oligomerization interface triple mutant in the cell is forming the dimer, but also larger oligomers that block  
37 its trafficking to the plasma membrane. EGFP extract eluted from the FPLC column in one peak at elution  
38 volume 15.5 to 16.5 ml, that correspond to monomeric form as expected, supporting that the previous  
39 observations are a result of the homo-oligomerization of mVP40.

#### 40 MD simulation of NTD and CTD oligomerization interfaces

41 To characterize the differences in the oligomer interfaces of eVP40 and mVP40 (Fig. 6A-B), we  
42 calculated the distance between the tryptophan residues (Trp<sup>95</sup>-Trp<sup>95</sup> for eVP40 and Trp<sup>83</sup>-Trp<sup>83</sup> for  
43 mVP40) at the interface. Upon relaxation with MD simulation, initially separated Trp<sup>83</sup> residues in the  
44 modeled mVP40 oligomer interface get closer and interact with each other (Fig. 6A, right panel). This is  
45 shown by the significant decrease in the Trp<sup>83</sup>-Trp<sup>83</sup> distance, whereas the W95 residues in eVP40 remain  
46 separated and the Trp<sup>95</sup>-Trp<sup>95</sup> distance does not change during the simulation window (Fig. 6C). In  
47 addition, Asn<sup>148</sup> is in close proximity to make occasional backbone hydrogen-bonding with Ile<sup>88</sup> at the  
48 interface.

49 To investigate the interactions at the CTD-CTD interface formed between the two hexamers  
50 shown in Fig. 1A, we simulated the CTD-CTD complex (Fig. 6D) for 100 ns. Similar to eVP40, this  
51 interface consists of primarily hydrophobic residues including Leu<sup>226</sup>, Pro<sup>220</sup>, Met<sup>191</sup>, Ala<sup>227</sup>, and Leu<sup>225</sup>.  
52 Therefore, Leu<sup>226</sup> is part of the hydrophobic core at the interface that provides stability as well as flexibility  
53 to the CTD hexamer-hexamer interface.

#### 54 **Discussion**

55 mVP40 is described as an anionic charge sensor with lack of stereospecificity to PI(4,5)P<sub>2</sub> at the  
56 plasma membrane compared to eVP40, which requires PI(4,5)P<sub>2</sub> for proper binding and matrix assembly  
57 (Johnson *et al.*, 2016; Wijesinghe and Stahelin, 2016). However, it is still not known how the  
58 oligomerization of mVP40 occurs to undergo matrix assembly and what role anionic lipids play in  
59 promoting the proper mVP40-mVP40 oligomerization during the virus assembly. HDX-MS analysis  
60 previously conducted on mV40 in the presence and absence of anionic lipids revealed two potential  
61 oligomerization interfaces (Wijesinghe *et al.*, 2017). The NTD oligomerization interface was proposed to  
62 include  $\beta$ 2,  $\beta$ 3 (Trp<sup>83</sup> residue), and  $\beta$ 7 antiparallel  $\beta$  sheet structures and the CTD oligomerization interface  
63 was proposed to include the  $\alpha$ 4 helix (Leu<sup>226</sup> residue) similarly to higher-ordered oligomerization of  
64 eVP40 hexamers (*via* CTD end-to-end contacts as previously described (Bornholdt *et al.*, 2013)). These  
65 two regions of mVP40 exhibited a reduced deuteration level in presence of anionic lipids (Wijesinghe *et al.*,  
66 2017). Furthermore, both NTD and the CTD oligomerization interfaces are hydrophobic suggesting  
67 multimerization driven by hydrophobic interactions. It is also possible that each interface is involved in a  
68 specific lipid-dependent oligomerization pattern of mVP40. To better understand the mechanism of these  
69 potential hydrophobic interactions at NTD and CTD, we replaced the residues Trp<sup>83</sup> in NTD and Leu<sup>226</sup> in  
70 CTD with the charged amino arginine to repulse protein-protein interactions in these regions.

71 In this study, the cellular analysis of NTD oligomerization interface double mutant W83R/N148A  
72 indicated inability to enrich at the plasma membrane compared to WT-mVP40. Further, the double mutant

73 had reduced higher-ordered oligomerization, significant increase of small oligomers (monomer-hexamer)  
74 and decreased budding deficiency. Similar results had been described previously on untagged or HA  
75 tagged mVP40 (Oda *et al.*, 2016; Koehler *et al.*, 2018). This mutant had been described to be able to  
76 dimerize in solution (Oda *et al.*, 2016) but no data were available on the oligomerization pattern of  
77 W83R/N148A at lipid membranes. Here, we demonstrated that the mutant is still able to multimerize  
78 (hexamer-12mer) but deficient to form higher-ordered oligomers at the plasma membrane of transfected  
79 cells. This inability of the NTD mutant can explain the deficiency in VLP formation and its low  
80 enrichment at the plasma membrane. This was also observed *in vitro* using PS:PI(4,5)P<sub>2</sub>-containing GUVs  
81 where only a small population (3.5 fold less than WT) could enrich at the vesicle's membranes suggesting  
82 proper enrichment and assembly at these membranes requires proper mVP40 NTD-mediated  
83 oligomerization. The single mutant W83R showed a similar oligomerization profile to WT but still was  
84 unable to form VLPs. This may suggest compensation in the Trp<sup>83</sup> mutant by the adjacent residue (Asn<sup>148</sup>),  
85 however, the NTD-NTD oligomerization through Trp<sup>83</sup> is a key process for VLP elongation and release.  
86 Moreover, the mutations at the NTD oligomerization interface had a comparable effect on the membrane  
87 rigidity increase compared to WT-mVP40 probably due to lipid rearrangement and/or clustering at the  
88 plasma membrane upon protein oligomerization. Lipid rearrangement and clustering (e.g., domain  
89 formation) is often required for virus particle budding (Krementsov *et al.*, 2010; Hogue *et al.*, 2011;  
90 Mücksch *et al.*, 2017; Madsen *et al.*, 2018) and a similar phenomena has been proposed at the inner leaflet  
91 of the plasma membrane where eVP40 hexamer significantly enhanced PI(4,5)P<sub>2</sub> clustering (GC *et al.*,  
92 2016) In this present study, we can't totally omit the ability of NTD oligomerization interface mutant to  
93 form proper VP40 hexamer structure but our data clearly demonstrate a significant deficiency in forming a  
94 functional viral matrix.

95 The CTD region of mVP40 contains two basic loops (1 and 2) involved in anionic lipid  
96 interactions. Previous HDX-MS studies highlighted the potential involvement of  $\alpha$ 4 helix at the CTD  
97 region, including residues Leu<sup>226</sup> and potentially Ser<sup>229</sup> in hexamer-hexamer interactions (Wijesinghe *et al.*,  
98 2017). The impacts of mutations on the CTD region were non-significant (L226R) or mild (L226R/S229A)  
99 on cellular localization, protein oligomerization and virus-like particle release. Importantly, in presence of  
100 the MARV glycoprotein, L226R mutant had reduced plasma membrane localization compared to WT-  
101 mVP40 and consistently this resulted in a reduction in VLP production. Furthermore, membrane fluidity  
102 analysis demonstrated that both L226R and L226R/S229A are unable to induce changes in plasma  
103 membrane rigidity compared to EGFP controls. Thus, we hypothesize that CTD-CTD oligomerization of  
104 mVP40 is important but not required to stabilize the matrix assembly that can result in lipid  
105 rearrangements at the plasma membrane. Our *in vitro* oligomerization assay of L226R mutant supports this  
106 hypothesis. Indeed, L226R enriched 1.5 fold less than the WT-mVP40 at PS:PI(4,5)P<sub>2</sub> containing  
107 membranes and more than 50% of enriched protein were small oligomers (dimer to hexamer) with a  
108 consistent decrease of more ordered oligomers (hexamer-12mer, 12mer-24mer and >24mer). Thus, larger  
109 mVP40 oligomers, which are attributed to CTD-CTD are more likely to alter the plasma membrane  
110 rigidity.

111 Investigating the role of each phospholipid in the *in vitro* oligomerization of WT-mVP40 and the  
112 mutants was in our opinion critical to better understand the involvement of each oligomerization interface  
113 in MARV matrix assembly. This simplified system with GUVs containing only PS, only PI(4,5)P<sub>2</sub> or both  
114 PS and PI(4,5)P<sub>2</sub>, provided an important understanding of anionic lipid-dependent mVP40  
115 oligomerization. First, in PS-containing GUVs, mVP40 forms mostly small oligomers (from monomer to  
116 hexamer) with a very small population (9.4%) of hexamer-12mer. This clearly demonstrates that upon  
117 binding to PS, mVP40 clusters at the membrane without further high-ordered oligomerization suggesting  
118 that NTD-NTD oligomerization is more prominent in presence of PS alone. Next and in PI(4,5)P<sub>2</sub>-  
119 containing GUVs, mVP40 was able to form higher-ordered oligomers up to 24mer compared to the  
120 previous conditions with a decrease of dimer-hexamer population. This indicated that upon PI(4,5)P<sub>2</sub>  
121 binding, mVP40 may undergo conformational changes that promote CTD-CTD interaction for high-  
122 ordered oligomerization. If our predictions on the role of Trp<sup>83</sup> and Asn<sup>148</sup> in mediating NTD-NTD  
123 oligomerization and of L226 in CTD-CTD oligomerization, the W83R/N148A mutant is most likely to  
124 exhibit a deficient oligomerization profile in PS-containing membranes, while L226R should have  
125 oligomerization defects in PI(4,5)P<sub>2</sub>-containing membranes. The relative decrease of oligomerization of  
126 W83R/N148A was indeed observed in PS-containing GUVs with a significant accumulation of

monomeric-dimeric protein at the membrane. However, L226R showed a very pronounced increase of dimer-hexamer population in PS:PI(4,5)P<sub>2</sub> but not in PI(4,5)P<sub>2</sub>-containing membranes. This suggested that the role of CTD-CTD interactions is more important in membranes close to physiological compositions and helps explain the inability of L226R and L226R/S229A mutations to increase plasma membrane fluidity upon mVP40 binding and assembly.

In the present study, we provided insight on the potential role of NTD and CTD interfaces in mVP40 membrane enrichment, protein oligomerization and matrix assembly, and VLP budding. Our *in vitro* analyses using anionic lipid-containing vesicles highlighted the structural changes that CTD and NTD oligomerization interfaces undergo upon lipid binding and oligomerization. It is not completely clear to us how and when the CTD-CTD oligomerization occurs. CTD-CTD-interactions may be required at a specific stage of the matrix assembly after protein associates with the plasma membrane and establishment of NTD-NTD interactions to initiate the protein high ordered-oligomerization. A recent model proposed CTD-CTD linear oligomerization that is most likely in both MARV and EBOV virions and VLPs (Wan *et al.*, 2020). However, our study suggests the importance of NTD-NTD oligomerization in cells and *in vitro* to establish the building blocks for higher-ordered oligomer formation and particle release. It is possible that NTD-NTD interactions are required to increase membrane bending, elongation of tubule and/or for host cell factor recruitment at assembly sites. Furthermore, using the recent model proposed in CTD-CTD linear oligomerization ((Wan *et al.*, 2020), Fig. S6), we simulated the CTD-CTD complex that indicated this interface may involve Met<sup>191</sup>, Asn<sup>222</sup>, Tyr<sup>195</sup> and Leu<sup>226</sup> as we report here (Fig. 6E). Future studies aimed at mutations of this region should help to clarify the detailed interactions that take place at these CTD-CTD interaction sites. Finally, the triple mutant WNL-mVP40 showed a completely different phenotype and behavior in cells or *in vitro*. The ability of the triple mutant to bind lipids efficiently and oligomerize suggests an uncommon and uncharacterized homo-oligomerization in cells and with lipid membranes, involving non-studied residues, that seemingly blocks the protein trafficking to the plasma membrane. Further analysis of structural rearrangement of this mutant can provide precious information on potential oligomerization of mVP40 required for cell signaling and/or trafficking.

Taken together, this study demonstrated that mVP40 has two oligomerization interfaces at NTD and at CTD. Each interface regulates specific protein oligomerization at the plasma membrane in a lipid-dependent manner, membrane fluidity changes, matrix assembly, VLP elongation and budding. Thus, small molecule or other therapeutic agents can be considered to disrupt the inter and intramolecular interactions of mVP40 to block the proper viral matrix assembly and prevent release of virus progeny.

## Materials and Methods

### Site directed mutagenesis

Site directed mutagenesis was performed using a Q5® Site-Directed Mutagenesis Kit (New England Bio labs) using primers listed in Table S1 according to the manufacturer's protocol. The same primer sets were used to generate mutants with pcDNA3.1-EGFP-WT-mVP40 or a His<sub>6</sub>-tag or EGFP tag in pET46 with the His<sub>6</sub>-WT-mVP40 vector originally a kind gift from Dr. E. Ollmann Saphire (La Jolla Institute for Immunology).

### Cell culture and live cell imaging

COS-7 or HEK293 cells were maintained in DMEM (Corning, NY) containing 10% FBS and 1% Penicillin/streptomycin at 37°C in a 5% CO<sub>2</sub> humidified incubator. Cells were grown until 70% confluency before transfection in 8 well Nunc Lab Tek II chambered slides with 0.16 mm cover glass thickness from Thermo Fisher Scientific (Waltham, MA). Transfections were performed using Lipofectamine 2000 or Lipofectamine LTX and PLUS reagents (supplied ThermoFisher Scientific) according to the manufacturer's protocol.

The enhanced green fluorescent protein (EGFP) signal was imaged 14 hours post transfection (performed at 37°C) on a Nikon Eclipse Ti Confocal inverted microscope (Nikon, Japan), using a Plan Achromat 60x 1.4 numerical aperture oil objective or a 100x 1.45 numerical aperture oil objective, respectively. Cells were stained for 15 min at 37°C with 5 µg/ml Hoechst 3342 and 5 µg/ml wheat germ agglutinin, Alexa Fluor 647 conjugate (WGA-Alexa Fluor 647, Molecular Probes™) in growth media, for

nucleus and plasma membrane staining, respectively. Cells were imaged using the 405 nm, 488 nm and 647 nm argon lasers to excite Hoechst, EGFP and WGA-Alexa Fluor 647, respectively. Plasma membrane localization ratios were calculated using the integrative density intensities at the plasma membrane determined using the WGA-Alexa Fluor 647 signal compared to the total intensities of the entire cell using ImageJ(Rasband, 2015).

### **Functional budding assays and Western blotting**

Functional budding assays were adapted from an established protocol (Harty, no date). HEK293 cells at  $1.5 \times 10^6$  density, were transfected with EGFP-mVP40 constructs with or without co-expression of mGP using Lipofectamine LTX and PLUS reagent according to the manufacturer's protocol. At 24 hours post transfection, the media containing virus-like particles (VLP) were harvested and collected as previously described (Oda *et al.*, 2016). Total protein contents (5  $\mu$ g) from cell lysates and VLP samples were resolved on a 12% SDS-PAGE gel (protein amount appropriate for 15 well gels) prior to transferring on nitrocellulose membrane. Target proteins were detected using indicated primary antibody, 1:200,000 dilution of Rabbit  $\alpha$ -mVP40 (IBT BioServices) and in some experiments 1:2000 dilution of Mouse  $\alpha$ -GFP (ThermoFisher), Mouse  $\alpha$ -GAPDH (ThermoFisher) was used at 1:10,000 final dilution, followed by the appropriate secondary antibodies horseradish peroxidase (HRP) conjugated, Goat  $\alpha$ -Rabbit or Sheep  $\alpha$ -Mouse (Abcam) at 1:5,000 final dilution for both. HRP signal was detected using Amersham Prime ECL reagent (GE Lifesciences, Chicago, IL) and imaged on a Amersham Imager 600. VLP budding index of different mVP40 proteins was performed with densitometry analysis using ImageJ (Rasband, 2015). The following equation was applied:

$$\text{Budding index} = \left( \frac{\text{Relative Pixel density}_{VLP-mVP40}}{\text{Relative Pixel density}_{Cell\ Lysate-mVP40/GAPDH} + \text{Relative Pixel density}_{VLP-mVP40}} \right)$$

The budding index of each mutant was normalized to the WT-mVP40 budding index.

### **Transmission electron microscopy: Chemical fixation and APEX processing**

$5.2 \times 10^5$  of HEK293 cells were seeded on 25 mm diameter poly-L-lysine coated cover glass. The next day, 2.5  $\mu$ g of each APEX2-csGBP plasmid and mVP40 constructs were co-transfected using Lipofectamine LTX reagents cells were incubated at 37°C, 5% CO<sub>2</sub> for 6 hours, then the transfection medium was changed for DMEM (Corning, NY) containing 10% FBS. Cells were then incubated at 37°C, 5% CO<sub>2</sub> for 8 hours, after which time cells were rinsed with Dulbecco's 1x PBS and were chemically fixed with 2.5% glutaraldehyde in 0.1M cacodylate buffer for 30 min. Fixed cells were then rinsed 3x for 5 min each with 0.1 M cacodylate buffer and washed with 1 mg/mL of 3,3'-diaminobenzidine (DAB) (Sigma-Aldrich) in cacodylate buffer for 2 min. Following the wash, cells were incubated in a freshly made solution of 1 mg/mL of DAB and 5.88 mM of hydrogen peroxide in cacodylate buffer for 25 min on ice. Cells were washed 3x for 5 min each with cacodylate buffer, incubated in an aqueous solution of 1% osmium tetroxide for 10 min and then washed with distilled water. Dehydration was conducted using increasing concentrations of ethanol (50%, 75%, 95%, and 100% made from 200 proof ethanol), transitioned using 100% acetonitrile and followed by resin infiltration of the cells using increasing concentrations of Embed 812 Epoxy resin without the accelerator in acetonitrile (2:1 and then 1:2), and finally with Embed 812 containing the accelerator. Coverslips were then embedded on resin filled beam capsules (cell-face-down) and incubated in an oven at 60°C for 24 hrs. After polymerization, coverslips were removed by dipping the coverslip faced block in liquid nitrogen. Serial sections were then collected by sectioning the block samples en face and ribbons were collected on formvar-coated slot grids.

Thin (90 nm) serial sections were obtained using a UC7 ultramicrotome (Leica) and collected onto formvar-coated copper slot grids (EMS). Glass knives were prepared for trimming, while an Ultra 35° diamond knife (Diatome) was used for sectioning the block samples. Sections were screened on a Tecnai T-12 80kV transmission electron microscope and average 10-15 cells were visualized from each sample.

### **Number & Brightness (N&B) analysis on mammalian cells**

Number & Brightness (N&B) experiments were performed as described previously (Adu-Gyamfi *et al.*, 2012a; Johnson *et al.*, 2016; Bobone *et al.*, 2017). HEK293 cells were seeded onto 1.5 mm poly-D-lysine coated coverslips with 0.17 mm thickness in 6-well plates at 70% confluency. Cells were transfected

27 with either EGFP or EGFP-tagged mVP40 constructs as described previously. Cells were washed 24 hours  
28 post transfection with 1x PBS, transferred to an Attofluor<sup>TM</sup> chamber (Invitrogen), and imaged in Live Cell  
29 Imaging Solution (Gibco, Life Technologies, Carlsbad, CA) using the Zeiss LSM 880 upright microscope  
30 (Carl Zeiss AG, Germany) and a LD “C-Apochromat” 40x/1.1 W Corr M27 objective and a 488 nm  
31 argon laser to excite EGFP. Each image was acquired using the same laser power (0.01), resolution  
32 (256x256), pixel dwell time (16  $\mu$ s), frames (50), and zoom (pixel size of 50 nm). SimFCS Global  
33 Software (Laboratory for Fluorescence Dynamics, University of California, Irvine, CA) was used for  
34 analysis.

35 On each experimental day, EGFP expressing cells were imaged and SimFCS4 software (G-SOFT  
36 Inc.) was used to determine the true brightness (B) of monomeric EGFP (0.058-0.13), which is consistent  
37 with previous analyses (Youker and Teng, 2014). To calculate the apparent brightness value of mVP40  
38 oligomers, the  $B_{\text{monomer}}$  value was multiplied by the corresponding oligomer value (i.e. dimer = 2, hexamer  
39 = 6). Using SimFCS, bins were placed in the brightness plot to correspond with the respective oligomer  
40 size. The number of pixels of monomer-hexamer, hexamer-12mer, 12mer-24mer, and 24mer+ bins were  
41 recorded. Average % pixels of each oligomeric state was ratiometrically determined by the total number of  
42 pixels in each bin vs. the total number of pixels in the image.

### 43 ***Laurdan and membrane fluidity analysis***

44 Membrane fluidity analysis was performed according to Owen *et al.* (2012) (Owen *et al.*, 2012). In  
45 brief, 14 hours post transfection of HEK293 cells with different mVP40 constructs or EGFP plasmid, cells  
46 were treated with 10  $\mu$ M laurdan (Invitrogen<sup>TM</sup>, stock made in DMSO at final concentration of 5 mM) in  
47 culture media and incubated for 30 min at 37°C in a humidified 5% CO<sub>2</sub> atmosphere. Cells were then  
48 imaged with a Ti-E inverted microscope equipped with Nikon's A1R confocal and a Spectra Physics IR  
49 laser tunable to 800 nm for multi-photon confocal imaging of the laurdan dye and images collected with  
50 photon multiplier tubes (PMT) set at 400–460 nm and 470–530 nm for ordered (PMT1) and disordered  
51 (PMT2) membranes, respectively. Calibration images were acquired with 100  $\mu$ M laurdan in culture  
52 media to calculate the measured generalized polarization factor (GP). Image processing was done using  
53 ImageJ and GP distribution was determined using the Laurdan\_GP macro provided in (Owen *et al.*, 2012).

### 54 ***Gel filtration analysis of EGFP and EGFP tagged WT and mutant mVP40 protein***

55 Human HEK293 cells were transfected with EGFP constructs 24 hours prior to protein extraction  
56 described previously in Liu *et al.* (Liu *et al.*, 2010). In brief, cells were washed with PBS and lysed with  
57 PBS containing 1% triton X-100, scrapped, collected and incubated on ice for 10 min. Lysates were  
58 cleared by centrifugation at 2,000 rpm for 10min at 4°C and filtrated through a 0.22- $\mu$ m-pore-size filter.  
59 The cleared protein extract was then separated according to protein sizes on Superdex<sup>TM</sup> 200 Increase  
60 10/300 GL, fast-protein liquid chromatography (FPLC) column using ÄKTA pure (GE healthcare). Eluted  
61 proteins were collected in 0.5-ml fractions and analyzed by SDS-PAGE and then by Western blotting with  
62 anti-EGFP antibody, as described above. The chromatogram plotting absorbance (280 nm) versus elution  
63 volume was generated with Unicorn 7.2 software.

### 64 ***Protein Purification***

65 Purification of mVP40 wild type, mutants (W83R/N148A, L226R, W83R/N148A/L226R) and  
66 His<sub>6</sub>-tag alone proteins was adapted from a previously established protocol (Wijesinghe and Stahelin,  
67 2016). In brief, protein expression was performed over night at 18°C with 250  $\mu$ M IPTG at an optical  
68 density (OD<sub>600nm</sub>) from 0.7 to 0.8. The bacteria pellets were lysed for 30 min on ice in lysis buffer: 20 mM  
69 Tris pH 8.0, 500 mM NaCl, 1x halt protease inhibitors, 300  $\mu$ g/ml lysozyme, 100  $\mu$ g/ml RNase and 3  $\mu$ M  
70 phenylmethylsulfonylfluoride (PMSF, Thermo Fisher Scientific, Waltham, MA). The lysis solutions were  
71 then subjected to 5 sonication cycles at 38% (10 sec ON, 59 sec OFF). After 1 hour centrifugation at  
72 15,000 x g at 4°C to clarify the lysate from cell debris and membranes, the protein solutions were  
73 incubated with Ni-NTA agarose for 30 min at 4°C with continuous rocking. The proteins were washed  
74 with 20 mM Tris pH 8.0, containing 500 mM NaCl and 50 mM imidazole prior to three 5 min stepwise  
75 elutions with 20 mM Tris pH 8.0, containing 500 mM NaCl and 300 mM imidazole. The mVP40 eluted  
76 fraction were washed and dialyzed against storage buffer 20 mM Tris pH 8.0, containing 500 mM NaCl  
77 and 20 % glycerol using 30K MWCO concentration tubes (or 3K MWCO for His-tag alone purification).

78 The protein purity and enrichment were confirmed by SDS-PAGE and size exclusion using a HiLoad®  
79 16/600 Superdex® 200 pg column using an ÄKTA pure (GE healthcare). However, for *in vitro* assays with  
80 lipids, the proteins were used post dialysis.

### 81 **Liposome Sedimentation Assays**

82 All lipid used here were purchased from Avanti Polar Lipids, Inc. (Alabaster, AL). Large  
83 unilamellar vesicles (LUV) were used for liposome sedimentation assays. Lipid mixtures were prepared at  
84 the indicated compositions and chloroform soluble lipids were dried to form lipid films under a continuous  
85 stream of N<sub>2</sub>. In each experiment, addition of anionic lipids was compensated with an equal mol%  
86 decrease in POPC, while POPE (9%) and dansylPE (1%) were held constant. Lipid films were then  
87 hydrated in liposome sedimentation buffer (260 μM raffinose pentahydrate in PBS, pH 7.4), vortexed  
88 vigorously, and extruded through a 200 nm Whatman polycarbonate filter (GE Healthcare) after incubation  
89 at 37°C. Vesicle size was confirmed by dynamic light scattering using a DelsaNano S Particle Analyzer  
90 (Beckman Coulter, Brea, CA). LUV solutions were diluted 4 times in PBS (pH 7.4) to reduce the raffinose  
91 pentahydrate concentration, and LUVs were pelleted at 50,000 x g (22°C) for 15 min. The supernatant  
92 was discarded and the raffinose filled-LUVs were resuspended in PBS (pH 7.4).

93 Liposome sedimentation assays were performed as described previously (Julkowska, Rankenberg  
94 and Testerink, 2013). In brief, protein and LUVs were mixed for final concentrations of 5 μg/ml and 2  
95 mM respectively, and incubated for 30 min on ice. Following incubation, protein bound-LUVs were  
96 pelleted (16,000 x g, 4°C, 30 min), and the supernatants containing unbound proteins were transferred into  
97 new tubes. The protein bound-LUV pellet was washed in PBS and pelleted again (16,000 x g, 4°C, 30  
98 min). The supernatant was discarded, and the pellet was resuspended in an equal volume as the unbound  
99 protein supernatant sample. Equal volumes of supernatant and pellet samples were resolved on a 10%  
00 SDS-PAGE gel and transferred onto a nitrocellulose membrane. The proteins were detected using the  
01 primary antibody (Mouse α-His at 1:2500 dilution, Sigma Aldrich) followed by the HRP conjugated  
02 secondary antibody (Sheep α-Mouse at 1:7000 dilution) The HRP signals were detected and analyzed as  
03 described above. To calculate %protein bound the following equation was used:

$$\% \text{Protein bound} = \left( \frac{\text{Relative Pixel density}_{\text{Pellet}}}{\text{Relative Pixel density}_{\text{Supernatant}} + \text{Relative Pixel density}_{\text{Pellet}}} \right) \times 100\%$$

### 04 **Giant unilamellar vesicle (GUV) preparation**

05 GUVs were prepared by a gentle hydration method (Reeves and Dowben, 1969; Darszon *et al.*,  
06 1980; Yamashita *et al.*, 2002). Briefly, 1 mM lipid of lipid control mixture was made and contained  
07 POPC:POPE:POPS:Biotin-PC:fluorescent PC (TopFluor PC) at 59:10:30:1:0.2% molar ratio, or with 2.5%  
08 molar ratio brain phosphatidylinositol 4,5-bisphosphate PI(4,5)P<sub>2</sub> added with the ratio of POPC were  
09 adjusted accordingly. PI(4,5)P<sub>2</sub>-containing lipid mixtures were made by mixing POPC, POPE, PI(4,5)P<sub>2</sub>,  
10 Biotin-PC and TopFluor PC at 84:10:5:1:0.2% molar ratio The lipid mixtures were made into a 5 mL  
11 round-bottom glass flask and the chloroform was removed with rotary movements under a continuous  
12 stream of N<sub>2</sub>. The lipid films were then hydrated overnight at 37°C in appropriate volume of GUV  
13 hydration buffer (10 mM HEPES, pH 7.4 containing 150 mM NaCl, and 0.5 M sucrose).

### 14 **N&B analysis on GUVs**

15 Freshly made GUVs were diluted 10 times in GUV dilution buffer (10 mM HEPES, pH 7.4  
16 containing 150 mM NaCl, and 0.5 M glucose) and placed on 6 mm diameter chambers made from a silicon  
17 sheet using a core sampling tool (EMS # 69039-60). The silicon chamber was mounted on a 1.5 mm clean  
18 coverglass (EMS # 72200-31) precoated with 1 mg/ml BSA:BSA-Biotin (9:1 molar ratio) for 20 min at  
19 room temperature, washed in a water bath and then overnight at room temperature with 5 μg/ml  
20 Neutravidin in PBS. Extra Neutravidin was also washed with water. The set up was then assembled with  
21 an Attofluor chamber. GUVs were immobilized for 10 min on BSA:BSA-Biotin and Neutravidin coated  
22 clean cover glasses. 7.5 μM mVP40 proteins or His-tag alone were incubated with 50 μg/ml Ni-NTA-Atto  
23 550 dye (Millipore Sigma, Burlington, MA) in a final volume of 500 μl, overnight at 4°C. Prior to  
24 incubation with GUVs, the proteins were concentrated to 100 μl using 30K MWCO concentration tubes  
25 (or 3K MWCO for His-tag alone purification). This step allowed to remove extra Ni-NTA-Atto 550 not  
26 bound to the proteins. The GUVs and proteins are then incubated for 30 min at 37°C at protein final



27 protein concentration of 1.5  $\mu\text{M}$  with the GUVs. N&B analysis was performed with the similar set up  
28 described above with some optimization. Briefly, at least 100 frames were imaged with Zeiss LSM 880  
29 upright microscope using a Plan Aplanachromat 63x 1.4 numerical aperture oil objective, laser power: 0.1%  
30 using 561 nm laser, image size 256 x 256 pixel, pinhole: 4  $\mu\text{m}$ , scan speed: 8.19 drop  $\mu\text{sec}$ , 16 bit depth.

31 On each experimental day, free NTA-Atto550 dye with GUVs was imaged and the true brightness  
32 (B) of a monomeric dye was determined (0.075-0.098). The apparent brightness value of mVP40  
33 oligomers was calculate as described above using SimFCS software. Bins were placed in the brightness  
34 plot to correspond with the respective oligomer size. The number of pixels of monomer-dimer, dimer-  
35 hexamer, hexamer-12mer, 12mer-24mer, and 24mer+ bins were recorded. Average % pixels of each  
36 oligomeric state at the GUV membrane was ratiometrically determined by the total number of pixels in  
37 each bin vs. the total number of pixels in the image

### 38 ***MLV sedimentation assay and in Vitro crosslinking reaction***

39 MLV sedimentation assays were performed as described previously (Wijesinghe and Stahelin,  
40 2016). For *in vitro* crosslinking assays, 0.2 mM LUVs were used. 2  $\mu\text{M}$  of mVP40 wild type or mutant  
41 proteins were allowed to incubate with LUVs of four different lipid compositions (100% PC, PC:PS  
42 (70:30), PC:PIP<sub>2</sub> (92.5:7.5), PC:PS:PIP<sub>2</sub> (75:20:5) for 20 minutes at room temperature with a total reaction  
43 volume of 50  $\mu\text{l}$ . Crosslinking agent – BS<sup>3</sup> (ThermoFisher Scientific) was added to a final concentration of  
44 1 mM and allowed to incubate with the lipid-protein mixture for 30 minutes. Reactions were stopped by  
45 adding 1  $\mu\text{l}$  of glycine to a final concentration of 50 mM for 15 minutes at room temperature. 20  $\mu\text{l}$  from  
46 each reaction was run on a SDS-PAGE gel and the protein bands were observed using silver staining.

### 47 ***HDX-MS analysis***

48 HDX-MS analysis of W83R/N148A, L226R/S229R and WNL mutants in the presence and  
49 absence of anionic lipid vesicles (PC:PS 55:45) was conducted as described in (Wijesinghe *et al.*, 2017).

### 50 ***Molecular Dynamics Simulations***

51 The mVP40 hexamer structure was modeled based on the eVP40 hexamer (PDB ID: 4LDD) as the  
52 template. The modeled mVP40 hexamer was relaxed with all atom molecular dynamics simulation using  
53 NAMD2.12. For this, an mVP40 hexamer system was set up using *Charmm gui* solvation builder<sup>4</sup>. The  
54 system was solvated using TIP3 water molecules in 0.15 M KCl. The simulation was performed with  
55 Charmm36m force fields<sup>5</sup> and a SHAKE algorithm was used to treat covalent atoms whereas pressure was  
56 maintained using the Nose-Hoover Langevin-piston method. Similarly, the particle mesh Ewald (PME)  
57 method was used for the long-range electrostatic interactions. After 10,000 steps of minimization and 200  
58 ps equilibration, production simulation was performed for 100 ns at 300 K using 2 fs time step.  
59 Additionally, two NTDs making up an oligomer interface was simulated for 150 ns. VMD was used to  
60 analyze the trajectories and protein images.

### 61 **References**

- 62  
63  
64 Adu-Gyamfi, E. *et al.* (2012a) ‘Investigation of Ebola VP40 assembly and oligomerization in live  
65 cells using number and brightness analysis’, *Biophysical Journal*. Biophysical Society, 102(11),  
66 pp. 2517–2525. doi: 10.1016/j.bpj.2012.04.022.  
67 Adu-Gyamfi, E. *et al.* (2012b) ‘Single-particle tracking demonstrates that actin coordinates the  
68 movement of the Ebola virus matrix protein’, *Biophysical Journal*, 103(9). doi:  
69 10.1016/j.bpj.2012.09.026.  
70 Adu-Gyamfi, E. *et al.* (2013) ‘The ebola virus matrix protein penetrates into the plasma  
71 membrane: A key step in viral protein 40 (VP40) oligomerization and viral egress’, *Journal of*  
72 *Biological Chemistry*, 288(8), pp. 5779–5789. doi: 10.1074/jbc.M112.443960.  
73 Adu-Gyamfi, E. *et al.* (2015) ‘Host Cell Plasma Membrane Phosphatidylserine Regulates the  
74 Assembly and Budding of Ebola Virus’, *Journal of Virology*. doi: 10.1128/jvi.01087-15.  
75 Ariotti, N. *et al.* (2015) ‘Modular Detection of GFP-Labeled Proteins for Rapid Screening by  
76 Electron Microscopy in Cells and Organisms’, *Developmental Cell*. doi:

- 77 10.1016/j.devcel.2015.10.016.
- 78 Bagatolli, L. A. *et al.* (2003) ‘Giant vesicles, laurdan, and two-photon fluorescence microscopy:  
79 Evidence of lipid lateral separation in bilayers’, *Methods in Enzymology*. doi: 10.1016/S0076-  
80 6879(03)60124-2.
- 81 Beer, B., Kurth, R. and Bukreyev, A. (1999) ‘Characteristics of Filoviridae: Marburg and Ebola  
82 Viruses’, *Naturwissenschaften*, 86(1), pp. 8–17. doi: 10.1007/s001140050562.
- 83 Bharat, T. A. M. *et al.* (2012) ‘Structural dissection of Ebola virus and its assembly determinants  
84 using cryo-electron tomography’, *Proceedings of the National Academy of Sciences*, 109(11), pp.  
85 4275–4280. doi: 10.1073/pnas.1120453109.
- 86 Bobone, S. *et al.* (2017) ‘Phosphatidylserine Lateral Organization Influences the Interaction of  
87 Influenza Virus Matrix Protein 1 with Lipid Membranes’, *Journal of Virology*, 91(12), pp. 1–15.  
88 doi: 10.1128/jvi.00267-17.
- 89 Bornholdt, Z. A. *et al.* (2013) ‘Structural Rearrangement of Ebola Virus VP40 Begets Multiple  
90 Functions in the Virus Life Cycle’, *Cell*, 154(4), pp. 763–774. doi: 10.1016/j.cell.2013.07.015.
- 91 Bray, M. and Geisbert, T. W. (2005) ‘Ebola virus: The role of macrophages and dendritic cells in  
92 the pathogenesis of Ebola hemorrhagic fever’, *The International Journal of Biochemistry & Cell*  
93 *Biology*, 37(8), pp. 1560–1566. doi: 10.1016/j.biocel.2005.02.018.
- 94 Breman, J. G. *et al.* (2016) ‘Discovery and Description of Ebola Zaire Virus in 1976 and  
95 Relevance to the West African Epidemic During 2013–2016’, *Journal of Infectious Diseases*,  
96 214(suppl 3), pp. S93–S101. doi: 10.1093/infdis/jiw207.
- 97 Darszon, A. *et al.* (1980) ‘Reassembly of protein-lipid complexes into large bilayer vesicles:  
98 perspectives for membrane reconstitution.’, *Proceedings of the National Academy of Sciences of*  
99 *the United States of America*, 77(1), pp. 239–243. doi: 10.1073/pnas.77.1.239.
- 00 Digman, M. A. *et al.* (2008) ‘Mapping the number of molecules and brightness in the laser  
01 scanning microscope’, *Biophysical Journal*. doi: 10.1529/biophysj.107.114645.
- 02 Feldmann, H., Klenk, H. D. and Sanchez, A. (1993) ‘Molecular biology and evolution of  
03 filoviruses.’, *Archives of virology. Supplementum*. doi: 10.1128/9781555815790.ch9.
- 04 Freed, E. O. (2015) ‘HIV-1 assembly, release and maturation’, *Nature Reviews Microbiology*,  
05 13(8), pp. 484–496. doi: 10.1038/nrmicro3490.
- 06 Gaus, K. *et al.* (2006) ‘Integrin-mediated adhesion regulates membrane order’, *Journal of Cell*  
07 *Biology*. doi: 10.1083/jcb.200603034.
- 08 GC, J. B. *et al.* (2016) ‘The Ebola virus protein VP40 hexamer enhances the clustering of  
09 PI(4,5)P<sub>2</sub> lipids in the plasma membrane’, *Phys. Chem. Chem. Phys.* doi: 10.1039/C6CP03776C.
- 10 Harty, R. N. *et al.* (2000) ‘A PPxY motif within the VP40 protein of Ebola virus interacts  
11 physically and functionally with a ubiquitin ligase: Implications for filovirus budding’,  
12 *Proceedings of the National Academy of Sciences*, 97(25), pp. 13871–13876. doi:  
13 10.1073/pnas.250277297.
- 14 Harty, R. N. (no date) ‘Hemorrhagic Fever Virus Budding Studies’, *Methods in Molecular*  
15 *Biology*, 1604. doi: 10.1007/978-1-4939-6981-4\_15.
- 16 Hilsch, M. *et al.* (2014) ‘Influenza A Matrix Protein M1 Multimerizes upon Binding to Lipid  
17 Membranes’, *Biophysical Journal*, 107(4), pp. 912–923. doi: 10.1016/j.bpj.2014.06.042.
- 18 Hogue, I. B. *et al.* (2011) ‘Gag Induces the Coalescence of Clustered Lipid Rafts and Tetraspanin-  
19 Enriched Microdomains at HIV-1 Assembly Sites on the Plasma Membrane’, *Journal of*  
20 *Virology*, 85(19), pp. 9749–9766. doi: 10.1128/JVI.00743-11.
- 21 Jasenosky, L. D. *et al.* (2001) ‘Ebola Virus VP40-Induced Particle Formation and Association  
22 with the Lipid Bilayer’, *Journal of Virology*, 75(11), pp. 5205–5214. doi:  
23 10.1128/JVI.75.11.5205.
- 24 Johnson, K. A. *et al.* (2016) ‘The Ebola Virus matrix protein, VP40, requires phosphatidylinositol  
25 4,5-bisphosphate (PI(4,5)P<sub>2</sub>) for extensive oligomerization at the plasma membrane and viral  
26 egress’, *Scientific Reports*. Nature Publishing Group, 6(September 2015), pp. 1–14. doi:

- 27 10.1038/srep19125.
- 28 Julkowska, M. M., Rankenberg, J. M. and Testerink, C. (2013) ‘Liposome-Binding Assays to
- 29 Assess Specificity and Affinity of Phospholipid--Protein Interactions’, in Munnik, T. and
- 30 Heilmann, I. (eds) *Plant Lipid Signaling Protocols*. Totowa, NJ: Humana Press, pp. 261–271. doi:
- 31 10.1007/978-1-62703-401-2\_24.
- 32 Koehler, A. *et al.* (2018) ‘Analysis of the multifunctionality of Marburg virus VP40’, pp. 1614–
- 33 1620. doi: 10.1099/jgv.0.001169.
- 34 Kolesnikova, L. *et al.* (2002) ‘VP40 , the Matrix Protein of Marburg Virus , Is Associated with
- 35 Membranes of the Late Endosomal Compartment’, 76(4), pp. 1825–1838. doi:
- 36 10.1128/JVI.76.4.1825.
- 37 Kolesnikova, L., Berghofer, B., *et al.* (2004) ‘Multivesicular Bodies as a Platform for Formation
- 38 of the Marburg Virus Envelope’, *Journal of Virology*. doi: 10.1128/jvi.78.22.12277-12287.2004.
- 39 Kolesnikova, L., Bamberg, S., *et al.* (2004) ‘The Matrix Protein of Marburg Virus Is Transported
- 40 to the Plasma Membrane along Cellular Membranes: Exploiting the Retrograde Late Endosomal
- 41 Pathway’, *Journal of Virology*. doi: 10.1128/jvi.78.5.2382-2393.2004.
- 42 Kolesnikova, L. *et al.* (2007) ‘Basolateral Budding of Marburg Virus: VP40 Retargets Viral
- 43 Glycoprotein GP to the Basolateral Surface’, *The Journal of Infectious Diseases*. doi:
- 44 10.1086/520584.
- 45 Kremontsov, D. N. *et al.* (2010) ‘HIV-1 assembly differentially alters dynamics and partitioning
- 46 of tetraspanins and raft components’, *Traffic*. doi: 10.1111/j.1600-0854.2010.01111.x.
- 47 Leroy, E. M., Gonzalez, J.-P. and Baize, S. (2011) ‘Ebola and Marburg haemorrhagic fever
- 48 viruses: major scientific advances, but a relatively minor public health threat for Africa’, *Clinical*
- 49 *Microbiology and Infection*, 17(7), pp. 964–976. doi: 10.1111/j.1469-0691.2011.03535.x.
- 50 Liu, Y. *et al.* (2010) ‘Conserved Motifs within Ebola and Marburg Virus VP40 Proteins Are
- 51 Important for Stability , Localization , and Subsequent Budding of Virus-Like Particles □’, 84(5),
- 52 pp. 2294–2303. doi: 10.1128/JVI.02034-09.
- 53 Madsen, J. J. *et al.* (2018) ‘Entropic forces drive clustering and spatial localization of influenza A
- 54 M2 during viral budding’, *Proceedings of the National Academy of Sciences of the United States*
- 55 *of America*. doi: 10.1073/pnas.1805443115.
- 56 Mücksch, F. *et al.* (2017) ‘Synchronized HIV assembly by tunable PIP2 changes reveals PIP2
- 57 requirement for stable gag anchoring’, *eLife*. doi: 10.7554/eLife.25287.
- 58 Nakai, K. *et al.* (2006) ‘Oligomerization of Hepatitis C Virus Core Protein Is Crucial for
- 59 Interaction with the Cytoplasmic Domain of E1 Envelope Protein’, *Journal of Virology*. doi:
- 60 10.1128/jvi.01203-06.
- 61 Noda, T. *et al.* (2002) ‘Ebola Virus VP40 Drives the Formation of Virus-Like Filamentous
- 62 Particles Along with GP’, *Journal of Virology*. doi: 10.1128/jvi.76.10.4855-4865.2002.
- 63 Oda, S. *et al.* (2016) ‘Crystal Structure of Marburg Virus VP40 Reveals a Broad , Basic Patch for
- 64 Matrix Assembly and a Requirement of the N-Terminal Domain for Immunosuppression’, 90(4),
- 65 pp. 1839–1848. doi: 10.1128/JVI.01597-15.Editor.
- 66 Owen, D. M. *et al.* (2012) ‘Quantitative imaging of membrane lipid order in cells and organisms’,
- 67 *Nature Protocols*. Nature Publishing Group, 7(1), pp. 24–35. doi: 10.1038/nprot.2011.419.
- 68 Rasband, W. (2015) ‘ImageJ [Software]’, *U. S. National Institutes of Health, Bethesda,*
- 69 *Maryland, USA*.
- 70 Reeves, J. P. and Dowben, R. M. (1969) ‘Formation and properties of thin□walled phospholipid
- 71 vesicles’, *Journal of Cellular Physiology*, 73(1), pp. 49–60. doi: 10.1002/jcp.1040730108.
- 72 Ruigrok, R. W. H. *et al.* (2000) ‘Structural characterization and membrane binding properties of
- 73 the matrix protein VP40 of Ebola virus’, *Journal of Molecular Biology*. doi:
- 74 10.1006/jmbi.2000.3822.
- 75 Slenczka, W. and Klenk, H. D. (2007) ‘Forty Years of Marburg Virus’, *The Journal of Infectious*
- 76 *Diseases*, 196(s2), pp. S131–S135. doi: 10.1086/520551.

- 77 Suzuki, Y. and Gojobori, T. (1997) ‘The origin and evolution of Ebola and Marburg viruses’,  
78 *Molecular Biology and Evolution*. doi: 10.1093/oxfordjournals.molbev.a025820.
- 79 Timmins, J. *et al.* (2003) ‘Ebola virus matrix protein VP40 interaction with human cellular factors  
80 Tsg101 and Nedd4’, *Journal of Molecular Biology*, 326(2), pp. 493–502. doi: 10.1016/S0022-  
81 2836(02)01406-7.
- 82 Del Vecchio, K. *et al.* (2018) ‘A cationic, C-terminal patch and structural rearrangements in  
83 Ebola virus matrix VP40 protein control its interactions with phosphatidylserine’, *Journal of*  
84 *Biological Chemistry*. doi: 10.1074/jbc.M117.816280.
- 85 Wan, W. *et al.* (2020) ‘Ebola and Marburg virus matrix layers are locally ordered assemblies of  
86 VP40 dimers’, *eLife*. doi: 10.7554/elife.59225.
- 87 Wijesinghe, K. J. *et al.* (2017) ‘Detection of lipid-induced structural changes of the Marburg virus  
88 matrix protein VP40 using hydrogen/deuterium exchange-mass spectrometry’, *Journal of*  
89 *Biological Chemistry*, 292(15), pp. 6108–6122. doi: 10.1074/jbc.M116.758300.
- 90 Wijesinghe, K. J. and Stahelin, V. (2016) ‘Investigation of the Lipid Binding Properties of the  
91 Marburg Virus’, 90(6), pp. 3074–3085. doi: 10.1128/JVI.02607-15.Editor.
- 92 World Health Organization (2019) ‘Ebola Virus disease: Democratic Republic of the Congo.’,  
93 (External Situation Report 66), pp. 1–9. Available at:  
94 [https://apps.who.int/iris/bitstream/handle/10665/324996/SITREP\\_EVD\\_DRC\\_20190528-](https://apps.who.int/iris/bitstream/handle/10665/324996/SITREP_EVD_DRC_20190528-eng.pdf?ua=1%0Ahttps://www.afro.who.int/health-topics/ebola-virus-disease)  
95 [eng.pdf?ua=1%0Ahttps://www.afro.who.int/health-topics/ebola-virus-disease.](https://www.afro.who.int/health-topics/ebola-virus-disease)
- 96 Yamashita, Y. *et al.* (2002) ‘A new method for the preparation of giant liposomes in high salt  
97 concentrations and growth of protein microcrystals in them.’, *Biochimica et biophysica acta*,  
98 1561(2), pp. 129–34. doi: 10.1016/s0005-2736(02)00338-3.
- 99 You, C. and Piehler, J. (2014) ‘Multivalent chelators for spatially and temporally controlled  
00 protein functionalization’, *Analytical and Bioanalytical Chemistry*, 406(14), pp. 3345–3357. doi:  
01 10.1007/s00216-014-7803-y.
- 02 Youker, R. T. and Teng, H. (2014) ‘Measuring protein dynamics in live cells: protocols and  
03 practical considerations for fluorescence fluctuation microscopy’, *Journal of Biomedical Optics*.  
04 doi: 10.1117/1.jbo.19.9.090801.
- 05 Adu-Gyamfi, E. *et al.* (2012a) ‘Investigation of Ebola VP40 assembly and oligomerization in live  
06 cells using number and brightness analysis’, *Biophysical Journal*. Biophysical Society, 102(11),  
07 pp. 2517–2525. doi: 10.1016/j.bpj.2012.04.022.
- 08 Adu-Gyamfi, E. *et al.* (2012b) ‘Single-particle tracking demonstrates that actin coordinates the  
09 movement of the Ebola virus matrix protein’, *Biophysical Journal*, 103(9). doi:  
10 10.1016/j.bpj.2012.09.026.
- 11 Adu-Gyamfi, E. *et al.* (2013) ‘The ebola virus matrix protein penetrates into the plasma  
12 membrane: A key step in viral protein 40 (VP40) oligomerization and viral egress’, *Journal of*  
13 *Biological Chemistry*, 288(8), pp. 5779–5789. doi: 10.1074/jbc.M112.443960.
- 14 Adu-Gyamfi, E. *et al.* (2015) ‘Host Cell Plasma Membrane Phosphatidylserine Regulates the  
15 Assembly and Budding of Ebola Virus’, *Journal of Virology*. doi: 10.1128/jvi.01087-15.
- 16 Ariotti, N. *et al.* (2015) ‘Modular Detection of GFP-Labeled Proteins for Rapid Screening by  
17 Electron Microscopy in Cells and Organisms’, *Developmental Cell*. doi:  
18 10.1016/j.devcel.2015.10.016.
- 19 Bagatolli, L. A. *et al.* (2003) ‘Giant vesicles, laurdan, and two-photon fluorescence microscopy:  
20 Evidence of lipid lateral separation in bilayers’, *Methods in Enzymology*. doi: 10.1016/S0076-  
21 6879(03)60124-2.
- 22 Beer, B., Kurth, R. and Bukreyev, A. (1999) ‘Characteristics of Filoviridae: Marburg and Ebola  
23 Viruses’, *Naturwissenschaften*, 86(1), pp. 8–17. doi: 10.1007/s001140050562.
- 24 Bharat, T. A. M. *et al.* (2012) ‘Structural dissection of Ebola virus and its assembly determinants  
25 using cryo-electron tomography’, *Proceedings of the National Academy of Sciences*, 109(11), pp.  
26 4275–4280. doi: 10.1073/pnas.1120453109.

- 127 Bobone, S. *et al.* (2017) ‘Phosphatidylserine Lateral Organization Influences the Interaction of  
128 Influenza Virus Matrix Protein 1 with Lipid Membranes’, *Journal of Virology*, 91(12), pp. 1–15.  
129 doi: 10.1128/jvi.00267-17.
- 130 Bornholdt, Z. A. *et al.* (2013) ‘Structural Rearrangement of Ebola Virus VP40 Begets Multiple  
131 Functions in the Virus Life Cycle’, *Cell*, 154(4), pp. 763–774. doi: 10.1016/j.cell.2013.07.015.
- 132 Bray, M. and Geisbert, T. W. (2005) ‘Ebola virus: The role of macrophages and dendritic cells in  
133 the pathogenesis of Ebola hemorrhagic fever’, *The International Journal of Biochemistry & Cell  
134 Biology*, 37(8), pp. 1560–1566. doi: 10.1016/j.biocel.2005.02.018.
- 135 Breman, J. G. *et al.* (2016) ‘Discovery and Description of Ebola Zaire Virus in 1976 and  
136 Relevance to the West African Epidemic During 2013–2016’, *Journal of Infectious Diseases*,  
137 214(suppl 3), pp. S93–S101. doi: 10.1093/infdis/jiw207.
- 138 Darszon, A. *et al.* (1980) ‘Reassembly of protein-lipid complexes into large bilayer vesicles:  
139 perspectives for membrane reconstitution.’, *Proceedings of the National Academy of Sciences of  
140 the United States of America*, 77(1), pp. 239–243. doi: 10.1073/pnas.77.1.239.
- 141 Digman, M. A. *et al.* (2008) ‘Mapping the number of molecules and brightness in the laser  
142 scanning microscope’, *Biophysical Journal*. doi: 10.1529/biophysj.107.114645.
- 143 Feldmann, H., Klenk, H. D. and Sanchez, A. (1993) ‘Molecular biology and evolution of  
144 filoviruses.’, *Archives of virology. Supplementum*. doi: 10.1128/9781555815790.ch9.
- 145 Freed, E. O. (2015) ‘HIV-1 assembly, release and maturation’, *Nature Reviews Microbiology*,  
146 13(8), pp. 484–496. doi: 10.1038/nrmicro3490.
- 147 Gaus, K. *et al.* (2006) ‘Integrin-mediated adhesion regulates membrane order’, *Journal of Cell  
148 Biology*. doi: 10.1083/jcb.200603034.
- 149 GC, J. B. *et al.* (2016) ‘The Ebola virus protein VP40 hexamer enhances the clustering of  
150 PI(4,5)P<sub>2</sub> lipids in the plasma membrane’, *Phys. Chem. Chem. Phys.* doi: 10.1039/C6CP03776C.
- 151 Harty, R. N. *et al.* (2000) ‘A PPxY motif within the VP40 protein of Ebola virus interacts  
152 physically and functionally with a ubiquitin ligase: Implications for filovirus budding’,  
153 *Proceedings of the National Academy of Sciences*, 97(25), pp. 13871–13876. doi:  
154 10.1073/pnas.250277297.
- 155 Harty, R. N. (no date) ‘Hemorrhagic Fever Virus Budding Studies’, *Methods in Molecular  
156 Biology*, 1604. doi: 10.1007/978-1-4939-6981-4\_15.
- 157 Hilsch, M. *et al.* (2014) ‘Influenza A Matrix Protein M1 Multimerizes upon Binding to Lipid  
158 Membranes’, *Biophysical Journal*, 107(4), pp. 912–923. doi: 10.1016/j.bpj.2014.06.042.
- 159 Hogue, I. B. *et al.* (2011) ‘Gag Induces the Coalescence of Clustered Lipid Rafts and Tetraspanin-  
160 Enriched Microdomains at HIV-1 Assembly Sites on the Plasma Membrane’, *Journal of  
161 Virology*, 85(19), pp. 9749–9766. doi: 10.1128/JVI.00743-11.
- 162 Jasenosky, L. D. *et al.* (2001) ‘Ebola Virus VP40-Induced Particle Formation and Association  
163 with the Lipid Bilayer’, *Journal of Virology*, 75(11), pp. 5205–5214. doi:  
164 10.1128/JVI.75.11.5205.
- 165 Johnson, K. A. *et al.* (2016) ‘The Ebola Virus matrix protein, VP40, requires phosphatidylinositol  
166 4,5-bisphosphate (PI(4,5)P<sub>2</sub>) for extensive oligomerization at the plasma membrane and viral  
167 egress’, *Scientific Reports*. Nature Publishing Group, 6(September 2015), pp. 1–14. doi:  
168 10.1038/srep19125.
- 169 Julkowska, M. M., Rankenberg, J. M. and Testerink, C. (2013) ‘Liposome-Binding Assays to  
170 Assess Specificity and Affinity of Phospholipid--Protein Interactions’, in Munnik, T. and  
171 Heilmann, I. (eds) *Plant Lipid Signaling Protocols*. Totowa, NJ: Humana Press, pp. 261–271. doi:  
172 10.1007/978-1-62703-401-2\_24.
- 173 Koehler, A. *et al.* (2018) ‘Analysis of the multifunctionality of Marburg virus VP40’, pp. 1614–  
174 1620. doi: 10.1099/jgv.0.001169.
- 175 Kolesnikova, L. *et al.* (2002) ‘VP40 , the Matrix Protein of Marburg Virus , Is Associated with  
176 Membranes of the Late Endosomal Compartment’, 76(4), pp. 1825–1838. doi:

- 10.1128/JVI.76.4.1825.
- 77  
78 Kolesnikova, L., Berghofer, B., *et al.* (2004) ‘Multivesicular Bodies as a Platform for Formation  
79 of the Marburg Virus Envelope’, *Journal of Virology*. doi: 10.1128/jvi.78.22.12277-12287.2004.
- 80 Kolesnikova, L., Bamberg, S., *et al.* (2004) ‘The Matrix Protein of Marburg Virus Is Transported  
81 to the Plasma Membrane along Cellular Membranes: Exploiting the Retrograde Late Endosomal  
82 Pathway’, *Journal of Virology*. doi: 10.1128/jvi.78.5.2382-2393.2004.
- 83 Kolesnikova, L. *et al.* (2007) ‘Basolateral Budding of Marburg Virus: VP40 Retargets Viral  
84 Glycoprotein GP to the Basolateral Surface’, *The Journal of Infectious Diseases*. doi:  
85 10.1086/520584.
- 86 Kremontsov, D. N. *et al.* (2010) ‘HIV-1 assembly differentially alters dynamics and partitioning  
87 of tetraspanins and raft components’, *Traffic*. doi: 10.1111/j.1600-0854.2010.01111.x.
- 88 Leroy, E. M., Gonzalez, J.-P. and Baize, S. (2011) ‘Ebola and Marburg haemorrhagic fever  
89 viruses: major scientific advances, but a relatively minor public health threat for Africa’, *Clinical  
90 Microbiology and Infection*, 17(7), pp. 964–976. doi: 10.1111/j.1469-0691.2011.03535.x.
- 91 Liu, Y. *et al.* (2010) ‘Conserved Motifs within Ebola and Marburg Virus VP40 Proteins Are  
92 Important for Stability, Localization, and Subsequent Budding of Virus-Like Particles □’, 84(5),  
93 pp. 2294–2303. doi: 10.1128/JVI.02034-09.
- 94 Madsen, J. J. *et al.* (2018) ‘Entropic forces drive clustering and spatial localization of influenza A  
95 M2 during viral budding’, *Proceedings of the National Academy of Sciences of the United States  
96 of America*. doi: 10.1073/pnas.1805443115.
- 97 Mücksch, F. *et al.* (2017) ‘Synchronized HIV assembly by tunable PIP2 changes reveals PIP2  
98 requirement for stable gag anchoring’, *eLife*. doi: 10.7554/eLife.25287.
- 99 Nakai, K. *et al.* (2006) ‘Oligomerization of Hepatitis C Virus Core Protein Is Crucial for  
00 Interaction with the Cytoplasmic Domain of E1 Envelope Protein’, *Journal of Virology*. doi:  
01 10.1128/jvi.01203-06.
- 02 Noda, T. *et al.* (2002) ‘Ebola Virus VP40 Drives the Formation of Virus-Like Filamentous  
03 Particles Along with GP’, *Journal of Virology*. doi: 10.1128/jvi.76.10.4855-4865.2002.
- 04 Oda, S. *et al.* (2016) ‘Crystal Structure of Marburg Virus VP40 Reveals a Broad, Basic Patch for  
05 Matrix Assembly and a Requirement of the N-Terminal Domain for Immunosuppression’, 90(4),  
06 pp. 1839–1848. doi: 10.1128/JVI.01597-15.Editor.
- 07 Owen, D. M. *et al.* (2012) ‘Quantitative imaging of membrane lipid order in cells and organisms’,  
08 *Nature Protocols*. Nature Publishing Group, 7(1), pp. 24–35. doi: 10.1038/nprot.2011.419.
- 09 Rasband, W. (2015) ‘ImageJ [Software]’, *U. S. National Institutes of Health, Bethesda,  
10 Maryland, USA*.
- 11 Reeves, J. P. and Dowben, R. M. (1969) ‘Formation and properties of thin-walled phospholipid  
12 vesicles’, *Journal of Cellular Physiology*, 73(1), pp. 49–60. doi: 10.1002/jcp.1040730108.
- 13 Ruigrok, R. W. H. *et al.* (2000) ‘Structural characterization and membrane binding properties of  
14 the matrix protein VP40 of Ebola virus’, *Journal of Molecular Biology*. doi:  
15 10.1006/jmbi.2000.3822.
- 16 Slenczka, W. and Klenk, H. D. (2007) ‘Forty Years of Marburg Virus’, *The Journal of Infectious  
17 Diseases*, 196(s2), pp. S131–S135. doi: 10.1086/520551.
- 18 Suzuki, Y. and Gojobori, T. (1997) ‘The origin and evolution of Ebola and Marburg viruses’,  
19 *Molecular Biology and Evolution*. doi: 10.1093/oxfordjournals.molbev.a025820.
- 20 Timmins, J. *et al.* (2003) ‘Ebola virus matrix protein VP40 interaction with human cellular factors  
21 Tsg101 and Nedd4’, *Journal of Molecular Biology*, 326(2), pp. 493–502. doi: 10.1016/S0022-  
22 2836(02)01406-7.
- 23 Del Vecchio, K. *et al.* (2018) ‘A cationic, C-terminal patch and structural rearrangements in  
24 Ebola virus matrix VP40 protein control its interactions with phosphatidylserine’, *Journal of  
25 Biological Chemistry*. doi: 10.1074/jbc.M117.816280.
- 26 Wan, W. *et al.* (2020) ‘Ebola and Marburg virus matrix layers are locally ordered assemblies of

27 VP40 dimers', *eLife*. doi: 10.7554/elife.59225.  
28 Wijesinghe, K. J. *et al.* (2017) 'Detection of lipid-induced structural changes of the Marburg virus  
29 matrix protein VP40 using hydrogen/deuterium exchange-mass spectrometry', *Journal of*  
30 *Biological Chemistry*, 292(15), pp. 6108–6122. doi: 10.1074/jbc.M116.758300.  
31 Wijesinghe, K. J. and Stahelin, V. (2016) 'Investigation of the Lipid Binding Properties of the  
32 Marburg Virus', 90(6), pp. 3074–3085. doi: 10.1128/JVI.02607-15.Editor.  
33 World Health Organization (2019) 'Ebola Virus disease: Democratic Republic of the Congo.',  
34 (External Situation Report 66), pp. 1–9. Available at:  
35 [https://apps.who.int/iris/bitstream/handle/10665/324996/SITREP\\_EVD\\_DRC\\_20190528-](https://apps.who.int/iris/bitstream/handle/10665/324996/SITREP_EVD_DRC_20190528-eng.pdf?ua=1%0Ahttps://www.afro.who.int/health-topics/ebola-virus-disease)  
36 [eng.pdf?ua=1%0Ahttps://www.afro.who.int/health-topics/ebola-virus-disease.](https://www.afro.who.int/health-topics/ebola-virus-disease)  
37 Yamashita, Y. *et al.* (2002) 'A new method for the preparation of giant liposomes in high salt  
38 concentrations and growth of protein microcrystals in them.', *Biochimica et biophysica acta*,  
39 1561(2), pp. 129–34. doi: 10.1016/s0005-2736(02)00338-3.  
40 You, C. and Piehler, J. (2014) 'Multivalent chelators for spatially and temporally controlled  
41 protein functionalization', *Analytical and Bioanalytical Chemistry*, 406(14), pp. 3345–3357. doi:  
42 10.1007/s00216-014-7803-y.  
43 Youker, R. T. and Teng, H. (2014) 'Measuring protein dynamics in live cells: protocols and  
44 practical considerations for fluorescence fluctuation microscopy', *Journal of Biomedical Optics*.  
45 doi: 10.1117/1.jbo.19.9.090801.

## 46 47 **Acknowledgments**

48  
49  
50 **General:** S.A., M.L.H., and R.V.S. thank Nathan J. Dissinger for excellent technical  
51 support

52  
53 **Funding:** These studies were supported by the NIH AI081077 to R.V.S., NIH  
54 GM020501, GM121964, AI117905, NS070899 to S.L., NIH T32 GM075762 to M.L.H.  
55 and K.J.W. and the Purdue Pharmacy Live Cell Imaging Facility (NIH OD027034  
56 R.V.S.). The authors acknowledge the use of the facilities of the Bindley Bioscience  
57 Center, a core facility of the NIH-funded Indiana Clinical and Translational Sciences  
58 institute and the use of the Purdue Life Science Electron Microscopy facility.

59  
60 **Author contributions:** S.A., M.L.H. and K.J.W. designed and performed research;  
61 S.M.A., B.S.G, P.P.C., N.B. and S.L. performed research and wrote corresponding  
62 sections; all authors analyzed data. S.A, M.L.H and R.V.S wrote the paper and all the  
63 authors agreed on the submitted manuscript.

64  
65 **Competing interests:** The authors declare no competing interests.

## 66 67 68 **Figures and Tables**

69  
70 **Fig. 1. mVP40 potential oligomerization interfaces at NTD and CTD regions. (A)**  
71 Zoomed in views of the structure of mVP40 at the NTD oligomer interface (upper  
72 panel) indicating Trp<sup>83</sup> and Asn<sup>148</sup> residues (pink) involved in the oligomerization  
73 with an overlay of Ebola virus VP40 (eVP40) structure with corresponding  
74 residues Trp<sup>95</sup> and Glu<sup>160</sup> (purple), and at the CTD interface (bottom panel)  
75 showing the potential residues Leu<sup>226</sup> and Ser<sup>229</sup> involved in hexamer-hexamer  
76 interactions. Modeled using PyMOL (mVP40 PDB ID: 5B0V) and (eVP40 PDB

77 ID: 4LDB). (B) Top and side views of a mVP40 filament (two hexamers formed  
78 through the NTD-NTD interface, Fig. S1). (C) and (D) Ribbon maps of  
79 W83R/N148A and L226R/S229A mutants, respectively, indicating the difference  
80 in deuteration percentage of mVP40 in the presence of PS-containing liposomes.  
81 Each row corresponds to each time point collected (10 to 1000 s). Color coding:  
82 blue indicates the regions that exchange slower and red indicates the regions that  
83 exchange faster in the presence of liposomes.

84 **Fig. 2. NTD and CTD oligomerization interfaces required for efficient mVP40**  
85 **trafficking to the plasma membrane.** (A) Confocal live images of cells  
86 expressing EGFP-constructs (green) +/- glycoprotein mGP, stained for DNA (blue)  
87 and plasma membrane (PM, pink). (B) Ratio of PM retention from A quantified by  
88 calculating the integrated density of pixels at PM to total pixels within the cell and  
89 normalized to WT. Data are represented as averages  $\pm$  S.E.M of three independent  
90 means. Statistical analysis was performed using one-way ANOVA with multiple  
91 comparison Holm-Sidak tests, (\*  $p=0.01$ , \*\*  $p=0.001$ , \*\*\*\*  $p<0.0001$ ). (C) and  
92 (D) are representative TEM micrographs of HEK293 cells co-expressing GBP-  
93 APEX2 and EGFP-mVP40 W83R/N148A and L226R, respectively. (E) and (F)  
94 Zoomed insets in (C) and (D) respectively. (G) TEM micrographs of potential  
95 VLPs at cell surfaces when expressing EGFP-mVP40 indicated constructs.  
96 Experimental and fitted normalized general polarization (GP) distribution curves  
97 of laurdan dye across PM of HEK293 cells with EGFP (black dashed line), (H)  
98 mutants of NTD (I) and CTD (J) oligomerization interfaces, compared to WT  
99 (blue line). GP values range from  $-1$  (very fluid lipid domains) to  $+1$  (very rigid  
00 lipid domains). The fitting procedure was performed using a non-linear Gaussian  
01 curve.

02 **Fig. 3. Cellular and *in vitro* oligomerization are impaired in NTD and CTD interface**  
03 **mutants reducing VLP budding.** (A) Average % pixels with each estimated  
04 oligomerization form from N&B analysis performed 24 h.p.t of HEK293 cells with  
05 EGFP-mVP40 constructs. Functional budding assays were performed to assess the  
06 capacity of WT-mVP40 and mutants to produce VLPs. (B) Representative Western  
07 blot assays performed on VLPs (top panel) and cell samples (middle and bottom  
08 panels) from cells 24 h.p.t in the presence and absence of glycoprotein. (C)  
09 Quantification of the budding index for each mVP40 protein (normalized to  
10 mVP40 WT) was determined by densitometry analysis. (D) Plotted average %  
11 pixel from N&B analysis of WT-mVP40 enriched at GUV membranes indicating  
12 the oligomerization profile of mVP40. (E) Oligomerization profiles of  
13 W83R/N148A, L226R, the monomeric mutant T105R and His-tag alone at the  
14 PS:PI(4,5)P<sub>2</sub>-containing membranes. (F) binding efficiency of WT-mVP40 (lane  
15 1) and mutants (lane 2: T105R, lane 3: L226R, lane 4: W83R/N148A) to anionic  
16 membrane (30% PS:2.5% PI(4,5)P<sub>2</sub>) assessed by liposome sedimentation assay  
17 and quantified in (G). Values are reported as mean  $\pm$  S.D (A, G) or  $\pm$  S.E.M (D, E)  
18 of three independent means. One-way ANOVA (C) or two-way ANOVA (G) with  
19 multiple comparisons were performed. (\* $p<0.05$ , \*\*\* $p<0.0005$ , \*\*\*\* $p<0.0001$ ).

20 **Fig. 4. *In vitro* study of NTD/CTD oligomerization interfaces triple mutant WNL-**  
21 **mVP40.** (A) Ribbon maps of W83R/N148A/L226R (WNL) mutant, indicating the  
22 difference in deuteration percentage in the presence of PC:PS (55%:45%)  
23 liposomes over the entire exchange period. Each row corresponds to each time  
24 point from 10 to 1000 seconds. Color coding: blue indicates the regions that  
25 exchange slower and red indicates the regions that exchange faster in the presence



26 of liposomes. **(B)** *In vitro* crosslinking indicates potential oligomerization mutant  
27 still capable of higher ordered structures in the presence of anionic liposomes.  
28 Lane 1: PC (100%), lane 2 PC:PS (60:40%), lane 3: PC:PI(4,5)P<sub>2</sub> (92:7.5%), lane  
29 4: PC:PS:PI(4,5)P<sub>2</sub> (75:20:5%) and lane 5: PC:PI(4,5)P<sub>2</sub> (90:10%). Blue asterisk  
30 indicates a potential hexamer size of mVP40. **(C)** Liposome sedimentation assay  
31 of WNL-mVP40 was performed using control membranes (no anionic lipids) or  
32 anionic membranes (30% PS:2.5% PI(4,5)P<sub>2</sub>). **(D)** oligomerization profile of WNL  
33 according to different anionic membranes 30%PS:2.5%PI(4,5)P<sub>2</sub> (molar ratio),  
34 30% PS only and 5% PI(4,5)P<sub>2</sub> only, determined from N&B analysis. **(E)**  
35 Representative original composite of the time-lapsed images (left panel), the  
36 number of pixels vs. intensity plot (middle panel) and brightness selection plot of  
37 the 30%PS:2.5%PI(4,5)P<sub>2</sub>-containing GUV (right panel).

38 **Fig. 5. Cellular behavior of WNL-mVP40 mutant.** **(A)** HEK293 cells, expressing  
39 EGFP-constructs +/-mGP, stained for DNA (blue) and PM (pink). **(B)** Ratios of  
40 PM retention represented as averages  $\pm$  S.E.M of three independent means. WT-  
41 mVP40 data are extracted from Fig. 1B. Statistical analysis was performed as  
42 described in Fig 2 (\*\*\*\* $p < 0.0001$ ). **(C)** Western blot assay performed on cells and  
43 VLP quantified in **(D)** as described in Fig. 3. **(E)** N&B analysis of cellular EGFP-  
44 WNL-mVP40 24 h.p.t. **(F)** Average % pixels of estimated oligomerization forms  
45 of EGFP- WT and WNL-mVP40. **(G)** Gaussian fitted normalized GP distribution  
46 curves of laurdan across PM of cells expressing EGFP-WNL-mVP40 (black)  
47 compared to WT (blue) and T105R-mVP40 (grey) as described in Fig 2. TEM  
48 micrographs of cells co-expressing GBP-APEX2 and EGFP-mVP40 (WT or  
49 WNL) in **(H)**, while **(I)** and insets **(J)** and **(K)** show the structure of intracellular  
50 WNL protein aggregations. **(L)** The chromatogram of gel filtration analysis of  
51 protein extract from HEK293 cells transfected with EGFP-WT-mVP40 shown as  
52 absorbance (280 nm) versus elution volume. Molecular mass standard curve is  
53 plotted in **(M)** as log values of molecular weights versus elution volume. **(N)**  
54 Western blot analyses of each protein are indicated. EGFP empty vector served as  
55 a negative control. CL: cell lysate.

56 **Fig. 6. Molecular dynamics simulations of the oligomer interfaces of the mVP40.** **(A)**  
57 The mVP40 oligomer interface modeled based on eVP40 structure initially shows  
58 separated W83 residues as in eVP40 (Trp<sup>95</sup>) shown in **(B)**. However, upon 150 ns  
59 MD simulation, the structure relaxes so that the interface residues W83 interact  
60 with each other. **(C)** Center of mass distance between Trp<sup>83</sup> residues in mVP40  
61 (black curve) and between W95 residues in eVP40 (red curve) as a function of  
62 time. **(D)** Hexamer-hexamer interface in the mVP40 filament (CTD from each  
63 monomer is in showed in different colors). The hydrophobic residues within 3 Å of  
64 Leu<sup>226</sup> at the mVP40 hexamer-hexamer interface are highlighted. The  
65 hydrophobic interaction at the hexamer-hexamer interface may provide an agile  
66 interface, giving flexibility to the filaments. **(E)** Zoom into hexamer-hexamer  
67 interface in the mVP40 filament formed through CTD-CTD linear oligomerization  
68 as proposed by Wan *et al.* (Wan *et al.*, 2020). (CTD from each monomer is in  
69 showed in different colors)

**Fig. 1**

**(A)**

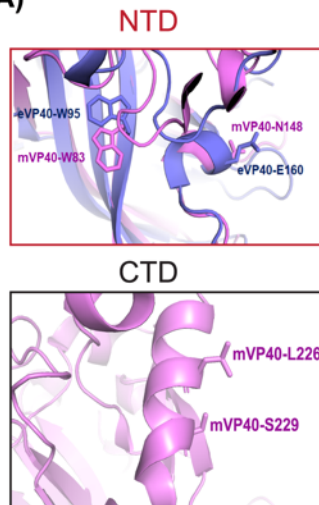

**(B)**

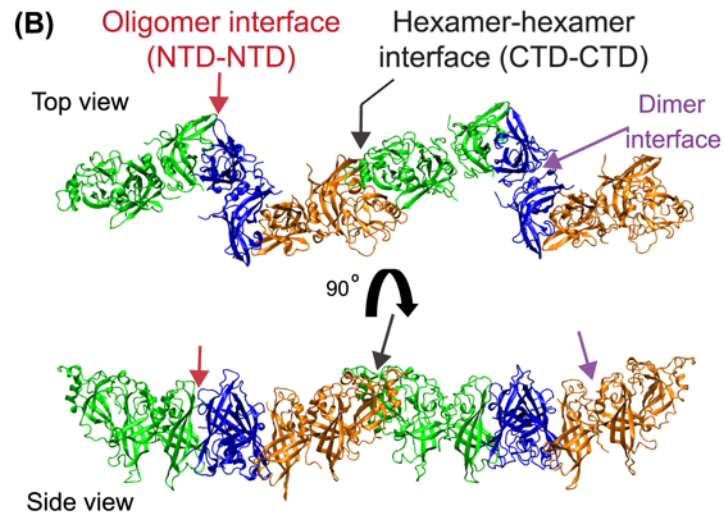

**(C)**

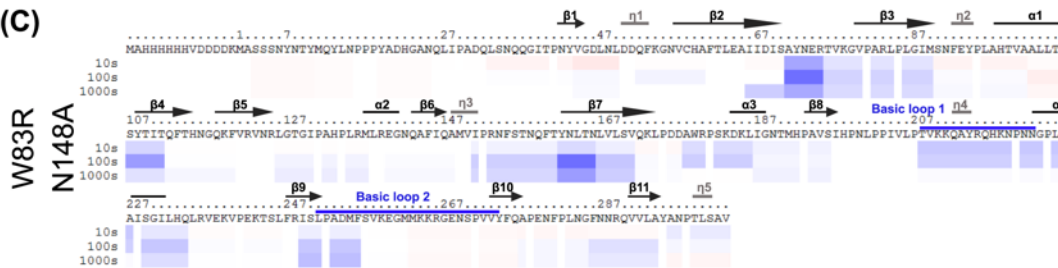

**(D)**

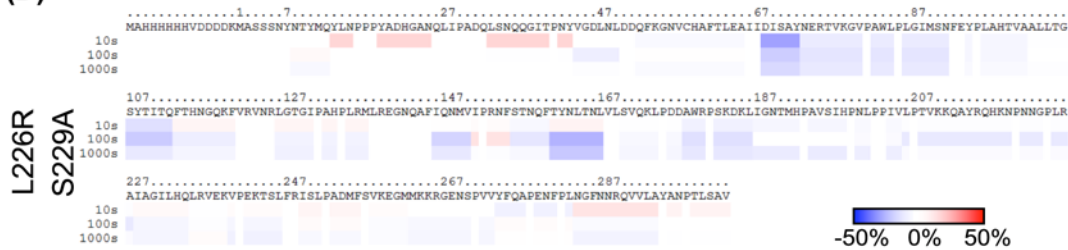

**Fig. 2**

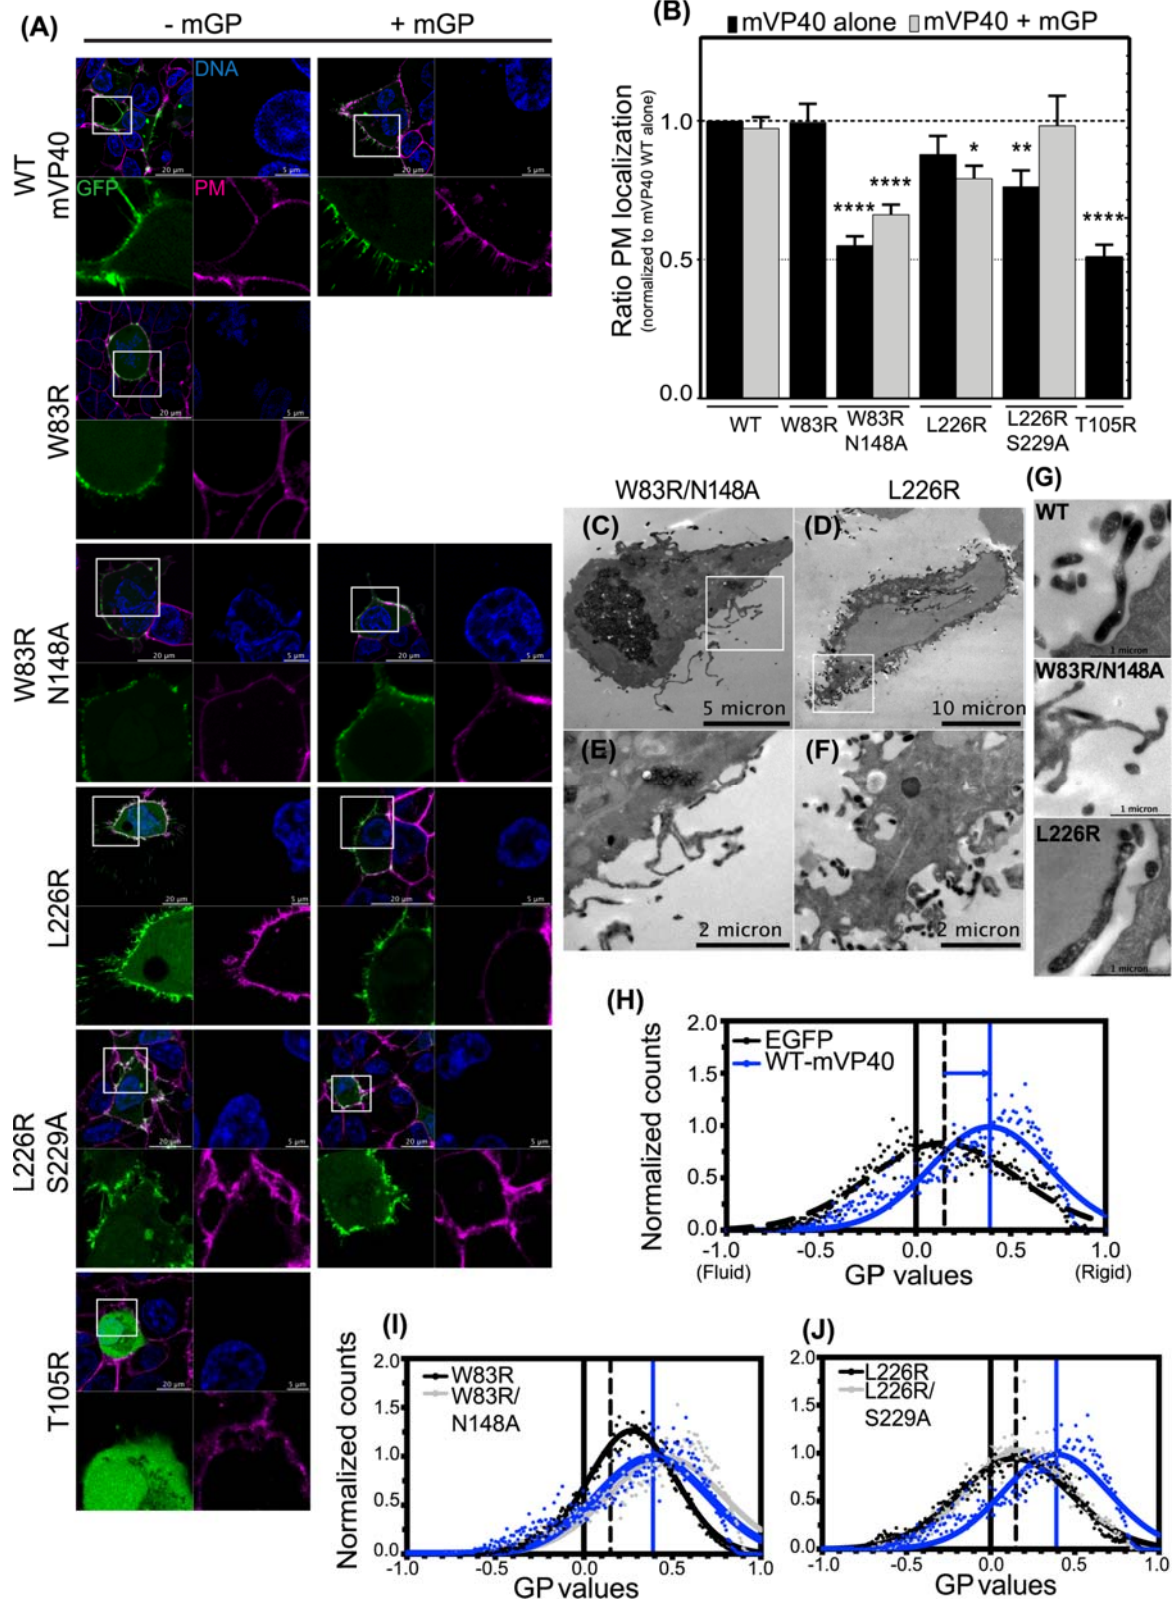

**Fig. 3**

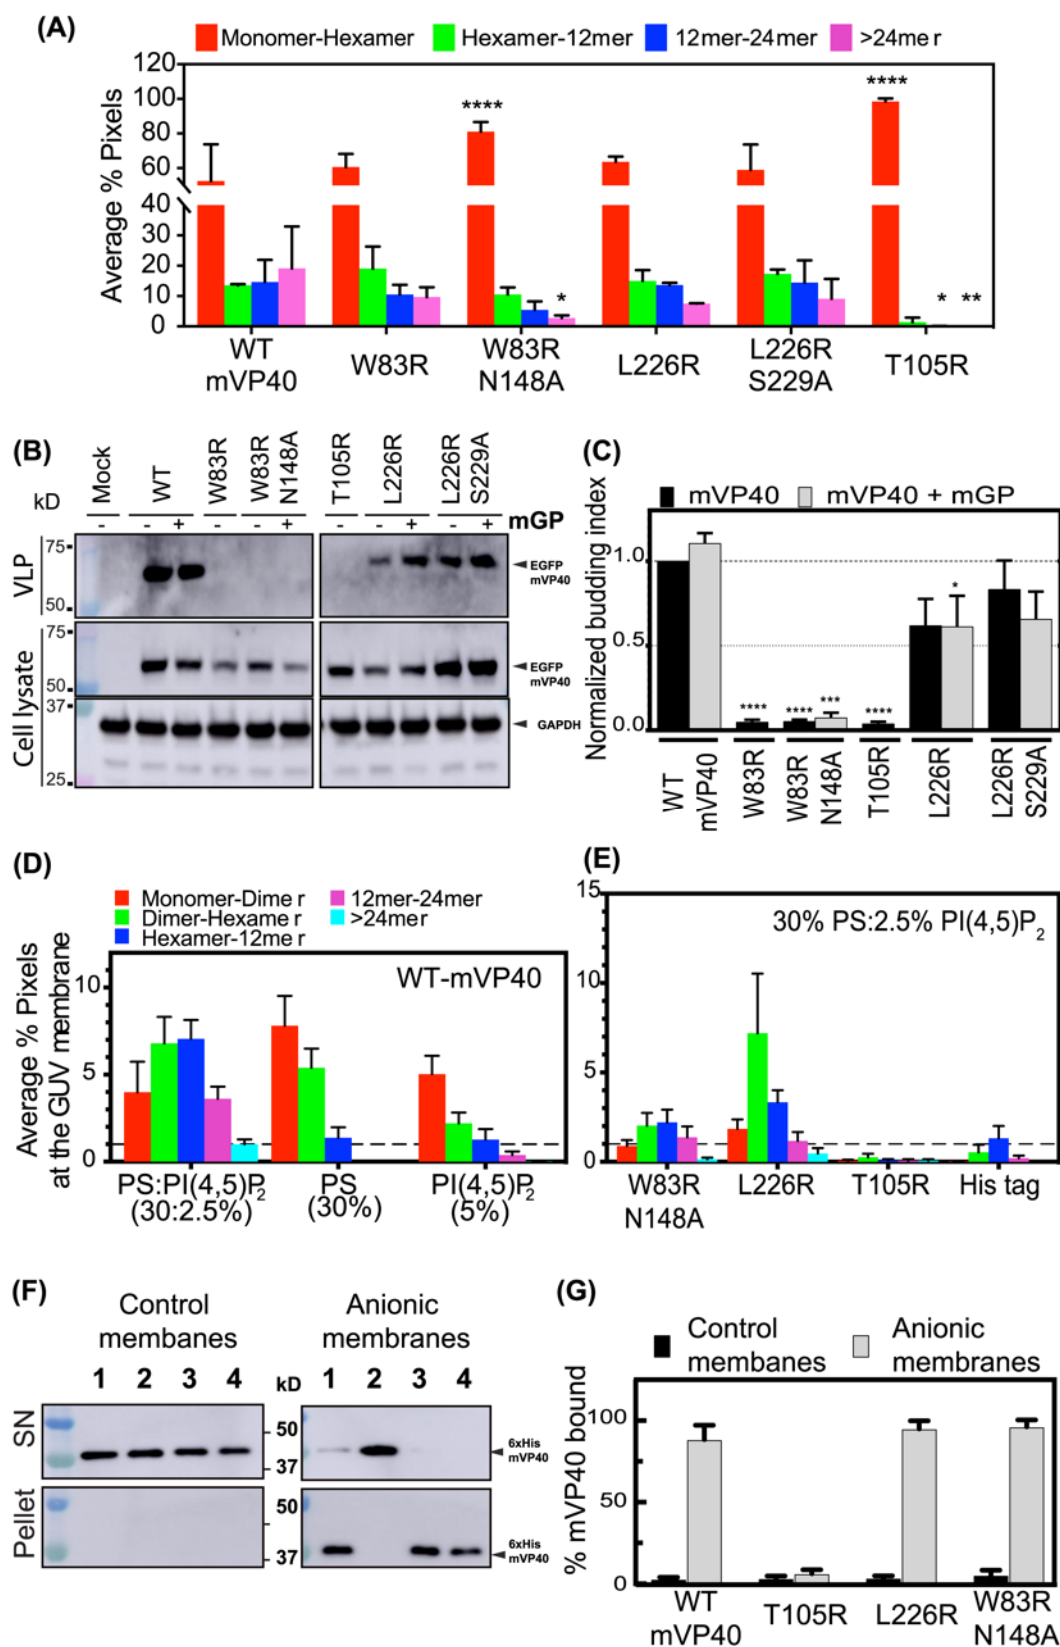

**Fig. 4**

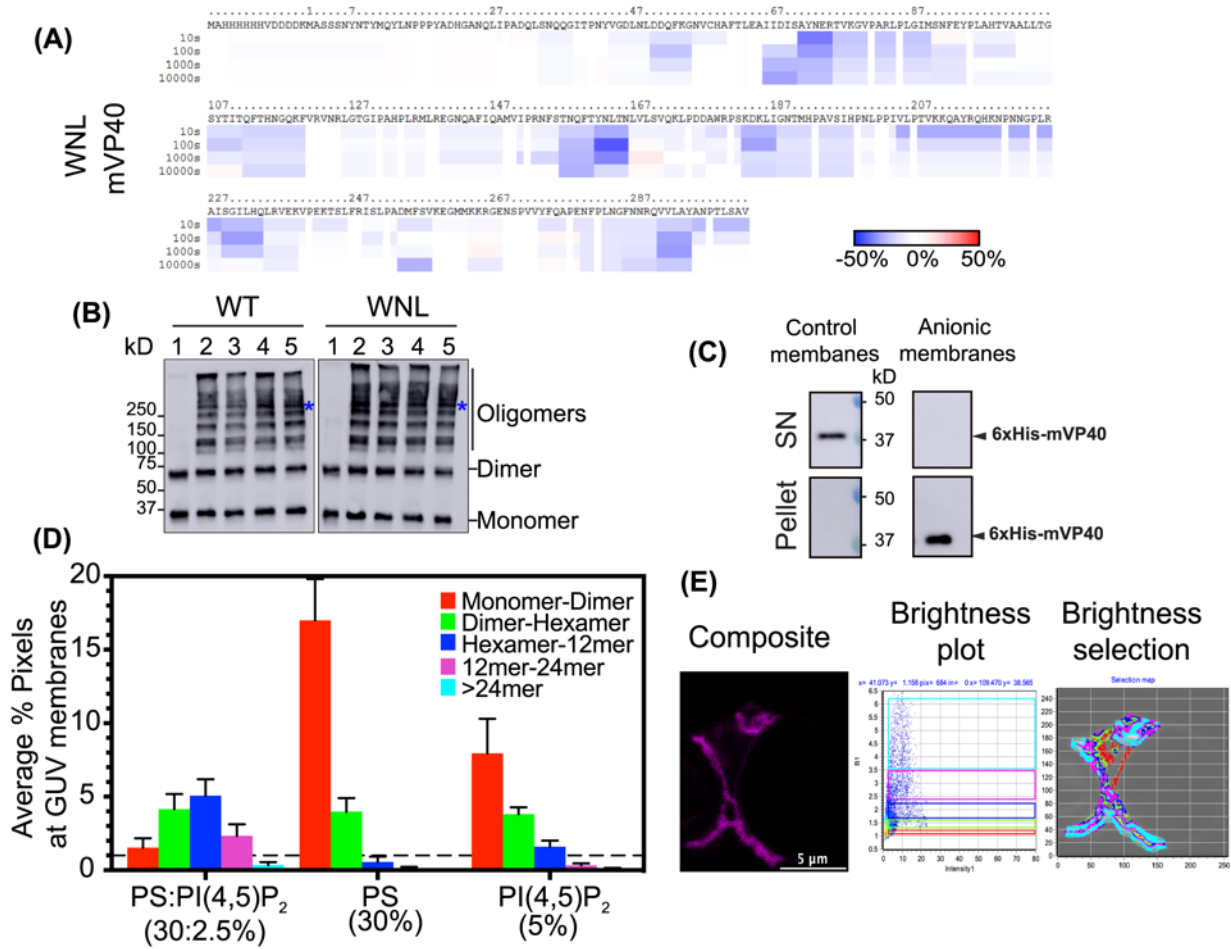

73

**Fig. 5**

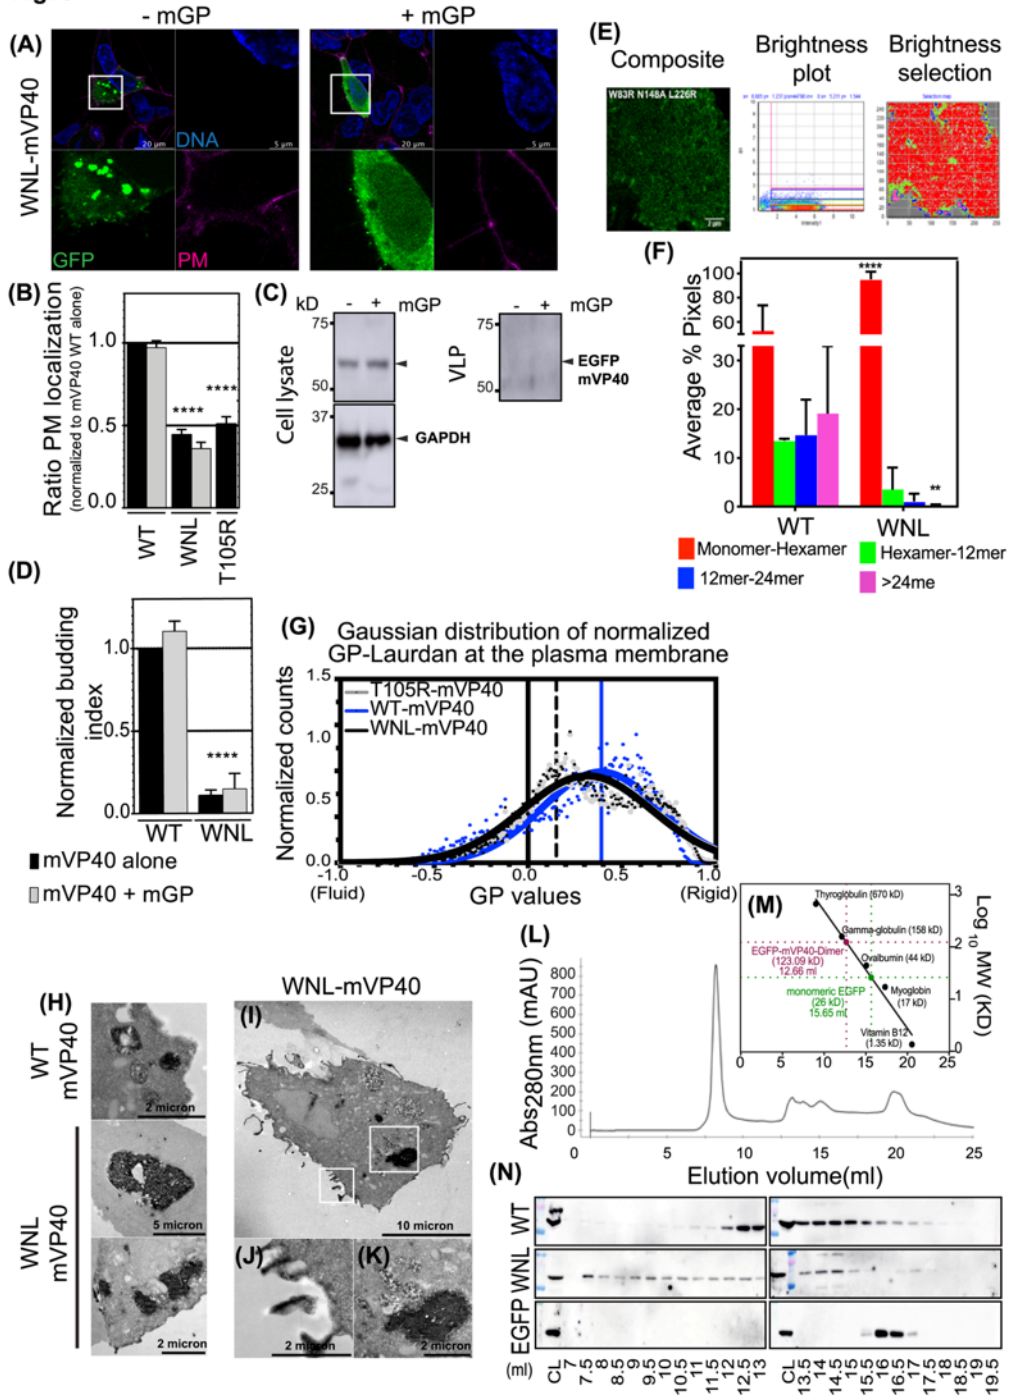

**Fig. 6**

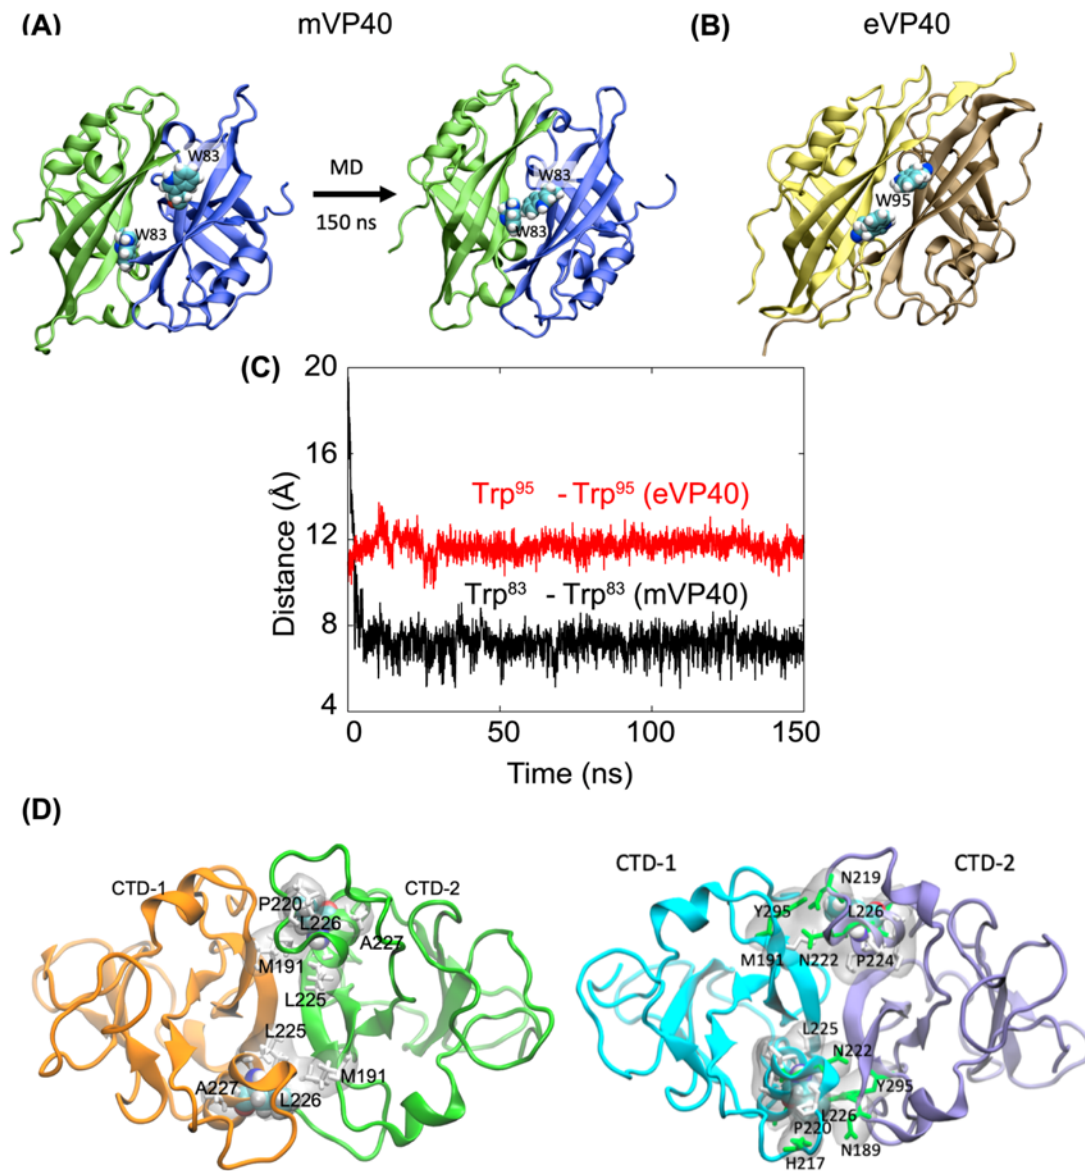

.75  
.76

## Supplementary Materials

**Table S1.** List of primers used to generate mVP40 mutant using site directed mutagenesis.

**Table S2.** Summary of live cell Number and Brightness analysis on eGFP-mVP40 expressing cells.

**Table S3.** Summary of Number and Brightness analysis on GUVs incubated with Ni-NTA-Atto550 conjugated 6cHis-mVP40 proteins.

**Figure S1. mVP40 potential oligomerization through binding to PS containing lipid vesicles.**

Structure of the mVP40 hexamer showing different modeled interfaces based on the Ebola VP40 (eVP40) hexamer (PDB ID: 4LDD). Each dimer is colored differently. (B) Differences in deuteration level (D%) in the presence of PS-containing liposomes mapped to mVP40 protein sequence. Each row corresponds to the exchange level compared to mVP40 in the absence of liposomes from 10 to 100,000 s. Color coding: blue indicates the regions that exchange slower in the presence of lipid and red adapted from *a* research originally published in the Journal of Biological Chemistry. Kaveesha J. Wijesinghe, Sarah Urata, Nisha Bhattarai, Edgar E. Kooijman, Bernard S. Gerstman, Prem P. Chapagain, Sheng Li, and Robert V. Stahelin. Detection of lipid-induced structural changes of the Marburg virus matrix protein VP40 using hydrogen/deuterium exchange-mass spectrometry. *J Biol Chem.* 2017; 292:6108-6122. © the American Society for Biochemistry and Molecular Biology (Wijesinghe *et al.*, 2017).

**Figure S2. Gel filtration analysis of mVP40 oligomerization interfaces.** Size exclusion chromatographs (SEC) of mVP40 wild type (WT), W83R/N148A, WNL and L226R mutants shown as absorbance (280nm) versus elution volume. In brief, proteins post Ni-NTA purification were injected onto HiLoad® 16/600 Superdex® 200 pg column. Dimeric mVP40 is eluted at elution volume from 68 ml to 82 ml. T105R-mVP40 is eluted as a monomer at elution volumes from 75 ml to 90 ml.

**Figure S3. EGFP-mVP40 displays typical membrane elongation and budding of filamentous VLPs at the surface of HEK293 cells co-expressing GBP-APEX2.** Electron microscopy micrographs of cells expressing different plasmids: (A) EGFP-mVP40 alone or (B), (C) with GBP-APEX2, for 14 hours before chemical fixation, post-stained (A) and (C) or not (B) prior to imaging. (D), (E) and (F) are zoomed insets from (A), (B) and (C), respectively.

**Figure S4. Laurdan general polarization (GP) images of HEK293 cells expressing EGFP-mVP40. Relationship between GP value and EGFP signal distributions across the plasma membrane.** HEK293 cells were incubated with 10  $\mu$ M laurdan dye 14 h.p.t with EGFP constructs. Multiphoton (top panel) and confocal imaging (bottom panel) were performed after 30 min incubation with the dye. Color coding: red indicates rigid membrane while blue indicates fluid membranes.

**Figure S5. Cellular and *in vitro* oligomerization profiles of mVP40 mutants analyzed through Number & Brightness analysis.** HEK293 cells transiently expressing GFP-fused mVP40 constructs (A) or GUV containing 30%PS:2.5% PI(4,5)P<sub>2</sub> incubated with 6xHis tagged protein coupled to Ni-NTA-Atto 550 (B) were imaged and Number & Brightness (N&B) analysis was performed using SimFCS software. Representative images of the workflow in SimFCS for N&B analysis of EGFP-WT-mVP40, EGFP-W83R-mVP40, EGFP-W83R/N148A-mVP40, EGFP-T105R-mVP40, EGFP-L226R-mVP40, EGFP-L226R/S229R-mVP40 are shown in (A) and in (B) from N&B analysis of GUV 6xHis-WT-mVP40, 6xHis- W83R/N148A-mVP40, 6xHis-T105R-mVP40, 6xHis-L226R-mVP40 and 6xHis tag alone. The original composite of the time-lapse images (left panel), the number of pixels vs. intensity plot (middle panel) and brightness selection plot of the cell (right panel) are shown for each analysis. (C) Oligomerization profiles of W83R/N148A, L226R and T105R mutants according to different anionic membranes 30% PS only and 5% PI(4,5)P<sub>2</sub> only, determined from N&B analysis. Values are reported as mean  $\pm$  S.E.M of three independent means.



27 **Figure S6. MD simulation of mVP40 potential CTD-CTD linear oligomerization.** Each  
28 mVP40 dimer is represented by a single color.

29 **Movie S1. Molecular Dynamics Simulation of NTD oligomerization interfaces in mVP40**  
30 **compared to eVP40.** The oligomerization of mVP40 through interactions of W83 residues at  
31 NTD is mediated by relaxation of NTD region of each protein. In contrast, the distance between  
32 W95 residues in eVP40 does not change over time during the MD simulation.  
33

**Table S1**

| mVP40 mutant  | Forward primer                    | Reverse primer                 | Backbone                                    |
|---------------|-----------------------------------|--------------------------------|---------------------------------------------|
| W83R          | CGTTCGGCAGTCTGCCT<br>CTTG         | CCTTTGACTGTTGCTCG              | WT-mVP40                                    |
| W83R/N148A    | TTTTATT CAGGCTATGGTGA<br>TCCC CAG | GCTTGATTTCTTCACGC              | W83R mutant                                 |
| L226R and WNL | TGGACCATTGC<br>GTGCCATATCTG       | TTGTTGGGATTTTGTGC              | WT-mVP40 and<br>W83R/N148A,<br>respectively |
| L226R/S229A   | GCGTGCCATAGCTGGCATC<br>CTCC       | AATGGTCCATTGTTG<br>GGATTTTGTGC | WT-mVP40                                    |

34  
35

**Table S2**

|                    | <b>Monomer-Hexamer<br/>(% ± SD)</b> | <b>Hexamer-12mer<br/>(% ± SD)</b> | <b>12mer-24mer<br/>(% ± SD)</b> | <b>&gt;24mer (% ± SD)</b> |
|--------------------|-------------------------------------|-----------------------------------|---------------------------------|---------------------------|
| <b>WT-mVP40</b>    | 52.62 ± 21.16                       | 13.58 ± 0.37                      | 14.70 ± 7.28                    | 19.10 ± 13.87             |
| <b>W83R</b>        | 60.70 ± 7.51                        | 19.04 ± 7.29                      | 10.57 ± 3.15                    | 9.68 ± 3.28               |
| <b>W83R/N148A</b>  | 81.15 ± 5.51                        | 10.58 ± 2.31                      | 5.48 ± 2.79                     | 2.80 ± 0.85               |
| <b>L226R</b>       | 63.74 ± 2.99                        | 15.03 ± 3.51                      | 13.67 ± 0.68                    | 7.55 ± 0.16               |
| <b>L226R/S229R</b> | 59.08 ± 14.59                       | 17.33 ± 1.45                      | 14.45 ± 7.32                    | 9.14 ± 6.52               |
| <b>WNL</b>         | 95.23 ± 6.36                        | 3.52 ± 4.50                       | 1.05 ± 1.61                     | 0.21 ± 0.25               |
| <b>T105R</b>       | 98.54 ± 1.66                        | 1.37 ± 1.55                       | 0.08 ± 0.09                     | 0.01 ± 0.02               |

36  
37

**Table S3**

|                   | % bound protein $\pm$ SD |                             |                                | Monomer-Dimer (mean % over total bound protein) |                             |                                | Dimer-Hexamer (mean % over total bound protein) |                             |                                | Hexamer-12mer (mean % over total bound protein) |                             |                                | 12mer-24mer (mean % over total bound protein) |                             |                                | >24mer (mean % over total bound protein) |                             |                                |
|-------------------|--------------------------|-----------------------------|--------------------------------|-------------------------------------------------|-----------------------------|--------------------------------|-------------------------------------------------|-----------------------------|--------------------------------|-------------------------------------------------|-----------------------------|--------------------------------|-----------------------------------------------|-----------------------------|--------------------------------|------------------------------------------|-----------------------------|--------------------------------|
|                   | <i>PS</i>                | <i>PI(4,5)P<sub>2</sub></i> | <i>PS:PI(4,5)P<sub>2</sub></i> | <i>PS</i>                                       | <i>PI(4,5)P<sub>2</sub></i> | <i>PS:PI(4,5)P<sub>2</sub></i> | <i>PS</i>                                       | <i>PI(4,5)P<sub>2</sub></i> | <i>PS:PI(4,5)P<sub>2</sub></i> | <i>PS</i>                                       | <i>PI(4,5)P<sub>2</sub></i> | <i>PS:PI(4,5)P<sub>2</sub></i> | <i>PS</i>                                     | <i>PI(4,5)P<sub>2</sub></i> | <i>PS:PI(4,5)P<sub>2</sub></i> | <i>PS</i>                                | <i>PI(4,5)P<sub>2</sub></i> | <i>PS:PI(4,5)P<sub>2</sub></i> |
| <b>WT-mVP40</b>   | 14.57 $\pm$ 11.85        | 8.89 $\pm$ 7.8              | 22.43 $\pm$ 19.2               | 53.60                                           | 56.54                       | 17.76                          | 36.93                                           | 24.72                       | 30.29                          | 9.40                                            | 14.25                       | 31.44                          | 0.07                                          | 4.25                        | 16.08                          | 0.00                                     | 0.23                        | 4.43                           |
| <b>W83R/N148A</b> | 20.38 $\pm$ 12.13        | 11.73 $\pm$ 13.61           | 6.62 $\pm$ 8.17                | 79.49                                           | 50.83                       | 13.31                          | 18.78                                           | 26.36                       | 30.51                          | 1.73                                            | 16.27                       | 33.31                          | 0.00                                          | 5.60                        | 20.70                          | 0.00                                     | 0.92                        | 2.17                           |
| <b>L226R</b>      | 20.63 $\pm$ 10.91        | 21.81 $\pm$ 12.02           | 14.02 $\pm$ 18.4               | 69.07                                           | 45.49                       | 13.15                          | 25.11                                           | 28.87                       | 51.36                          | 5.72                                            | 17.49                       | 23.77                          | 0.10                                          | 6.04                        | 8.37                           | 0.00                                     | 2.12                        | 3.35                           |
| <b>WNL</b>        | 21.65 $\pm$ 15.18        | 13.78 $\pm$ 12.29           | 13.34 $\pm$ 12.53              | 78.52                                           | 57.70                       | 11.36                          | 18.40                                           | 27.66                       | 30.88                          | 2.56                                            | 11.57                       | 37.78                          | 0.52                                          | 2.39                        | 17.40                          | 0.00                                     | 0.69                        | 2.58                           |
| <b>T105R</b>      | 0.02 $\pm$ 0.07          | 1.03 $\pm$ 1.36             | 0.55 $\pm$ 1.64                | -                                               | -                           | -                              | -                                               | -                           | -                              | -                                               | -                           | -                              | -                                             | -                           | -                              | -                                        | -                           | -                              |

38  
39

**Fig. S1**

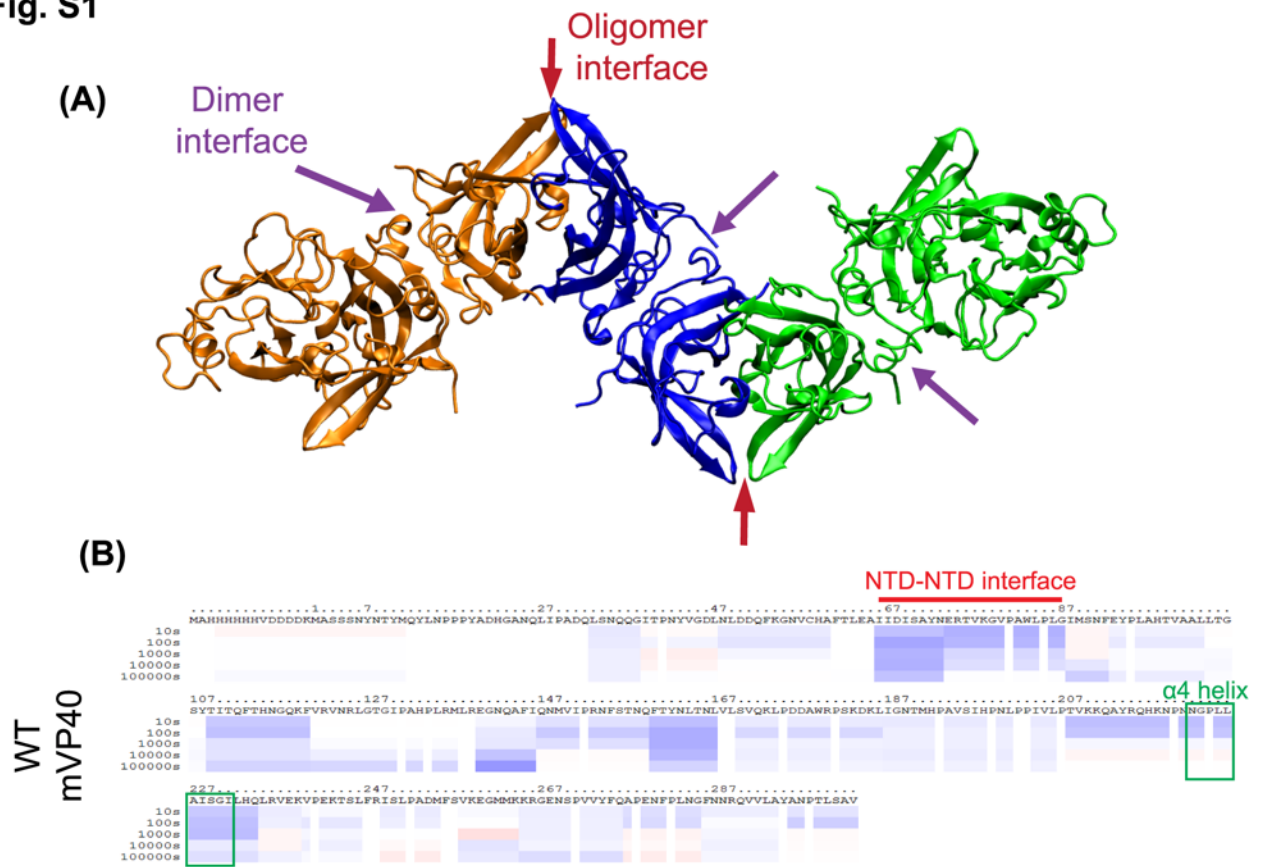

40  
41

42

**Fig. S2**

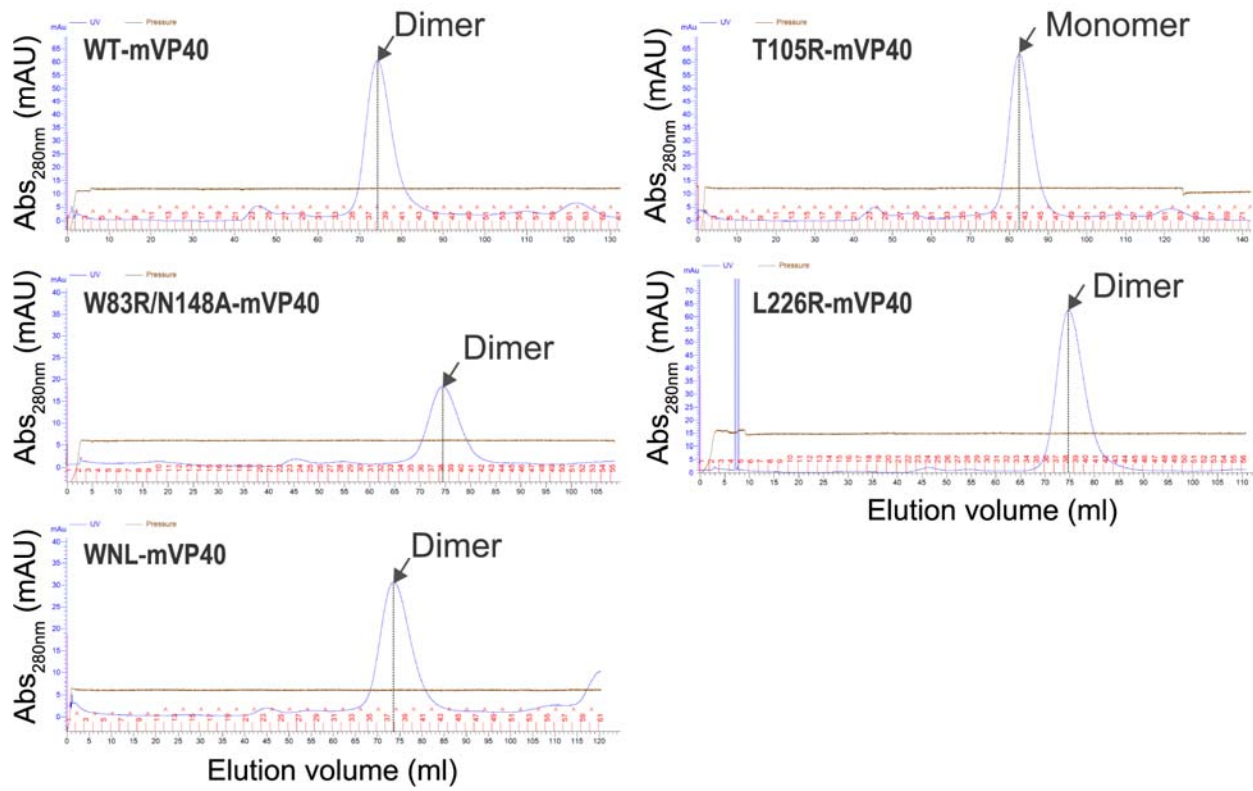

43  
44

**Fig. S3**

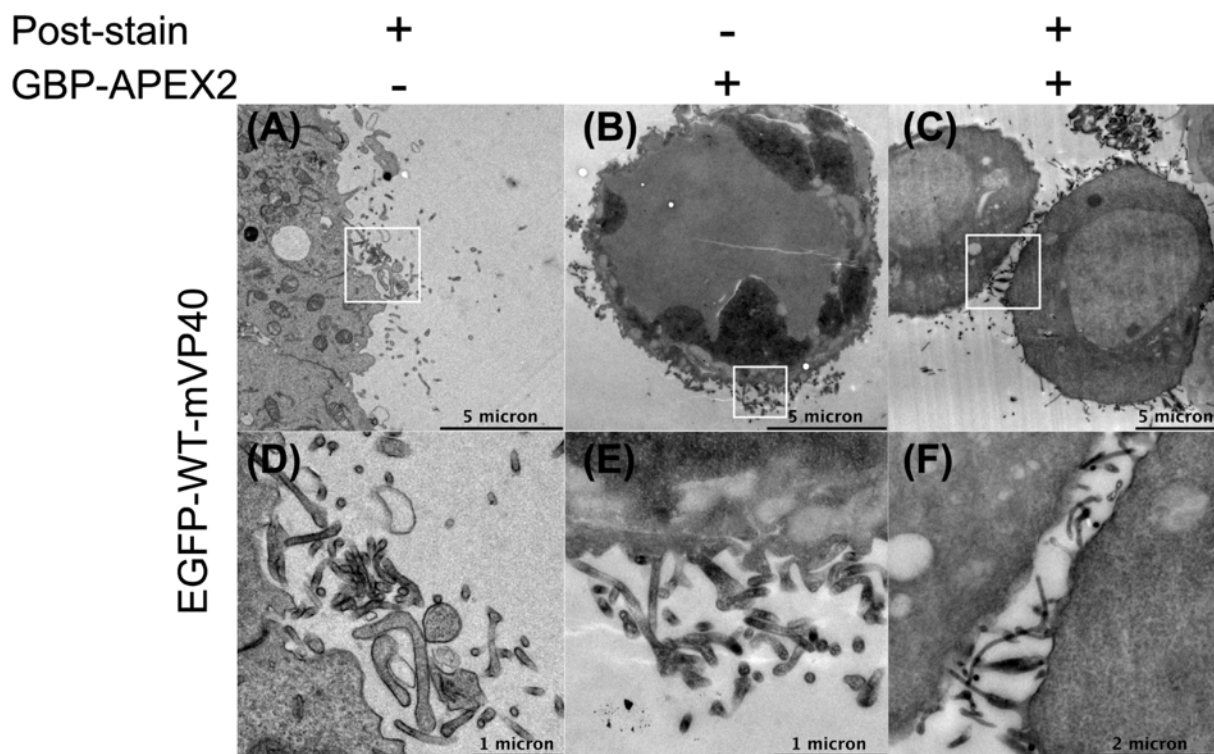

45  
46

**Fig. S4**

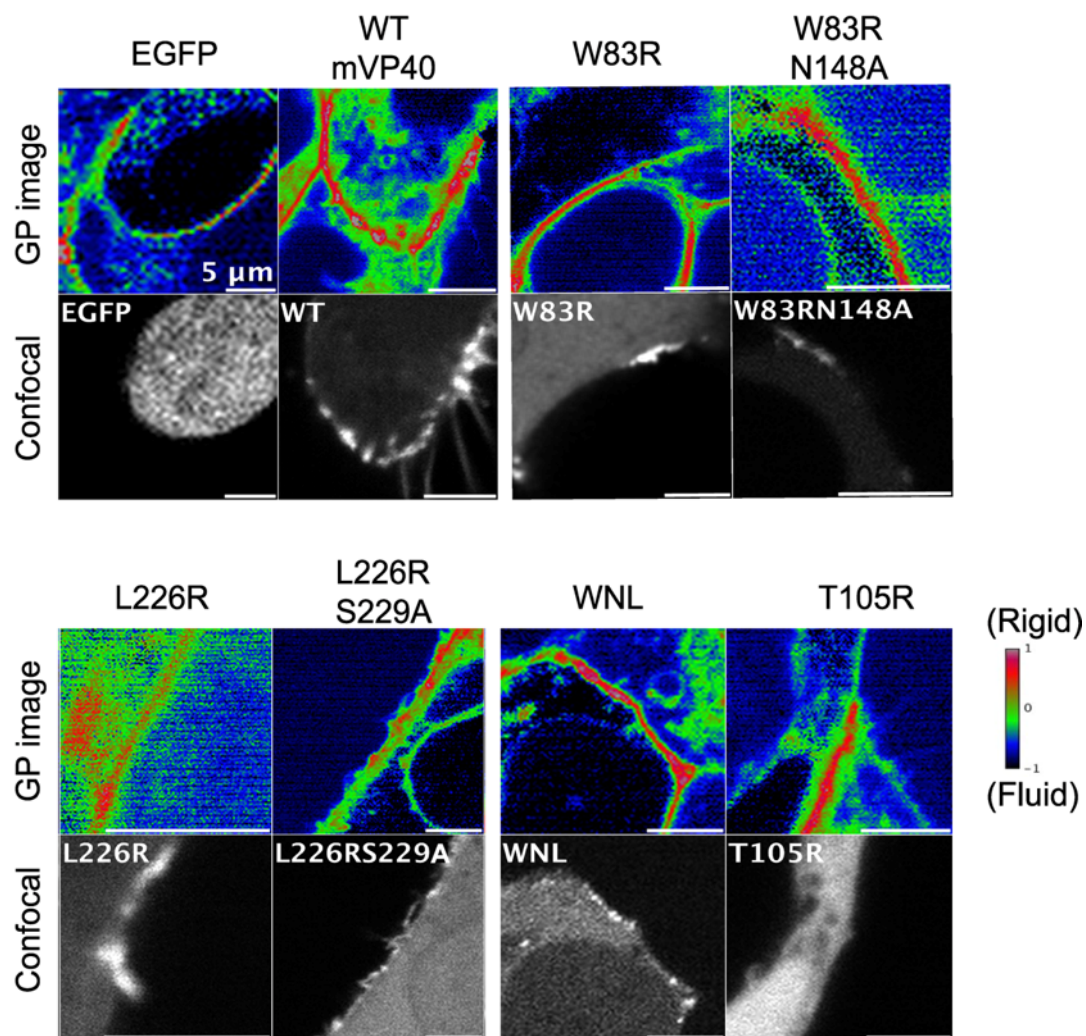

47  
48



Fig. S5

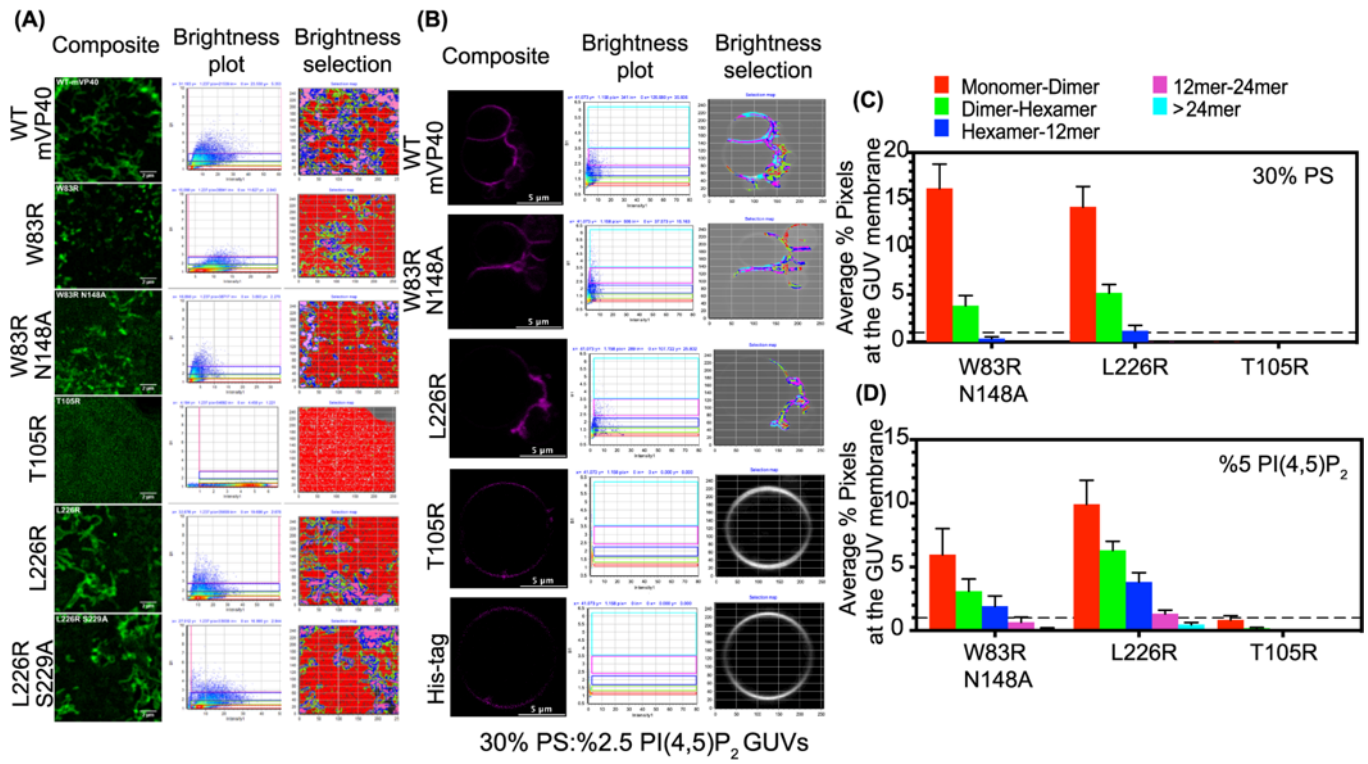

49  
50

**Fig. S6**

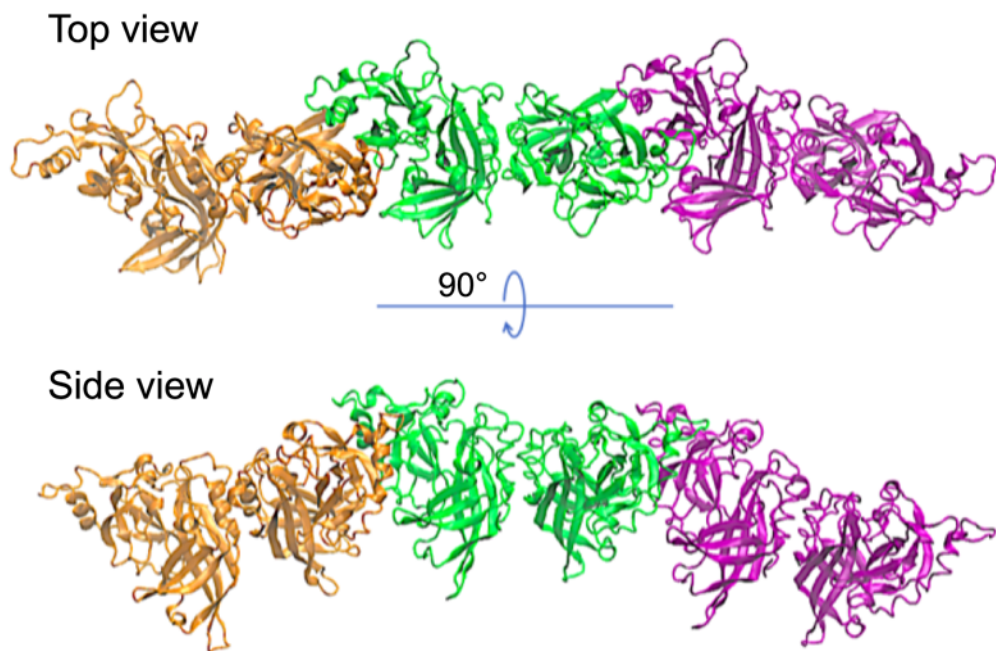

51
